# Supplementary material for: Oxidative C(sp3)–H amidation of tertiary arylamines with nitriles
Source: Royal Society of Chemistry journal article supplement (doi:10.1039/c8qo00794b), 2018-01-01

## Electronic Supplementary Information

for

### Oxidative C(sp<sup>3</sup>)-H amidation of tertiary arylamines with nitriles

Binzhou Lin,<sup>a</sup> Shanshan Shi,<sup>a</sup> Yiqun Cui,<sup>a</sup> Yupei Liu,<sup>a</sup> Guo Tang,<sup>a,\*</sup> and Yufen Zhao<sup>a,b</sup>

<sup>a</sup> Department of Chemistry, College of Chemistry and Chemical Engineering, and the Key Laboratory for Chemical Biology of Fujian Province, Xiamen University, Xiamen, Fujian 361005, China

<sup>b</sup> Institute of Drug Discovery Technology, Ningbo University, Ningbo, Zhejiang 450052, China

Fax: (86)592-2185610; e-mail: t12g21@xmu.edu.cn

#### Table of Contents

|                                                                      |            |
|----------------------------------------------------------------------|------------|
| General and Experimental Section                                     | ESI 2      |
| Spectral Data                                                        | ESI 3 – 8  |
| <sup>1</sup> H NMR and <sup>13</sup> C NMR Spectra for All Compounds | ESI 9 – 27 |
| HRMS (FT-ICR-MS) Spectrum for TEMP                                   | ESI 28     |

### General:

All reactions were carried out under air. Unless otherwise noted, all reagents were obtained from commercial suppliers and used without further purification.  $^1\text{H}$  NMR (400 MHz) and  $^{13}\text{C}$  NMR (100 MHz) spectra were measured on Bruker AVIII 400M spectrometers with  $\text{CDCl}_3$  as solvent and tetramethylsilane (TMS) as internal standard. Chemical shifts were reported in units (ppm) by assigning TMS resonance in the  $^1\text{H}$  spectrum as 0.00 ppm and  $\text{CDCl}_3$  resonance in the  $^{13}\text{C}$  spectrum as 77.26 ppm. All coupling constants ( $J$  values) were reported in Hertz (Hz). Chemical shifts of common trace  $^1\text{H}$  NMR impurities (ppm):  $\text{H}_2\text{O}$ : 1.56,  $\text{CHCl}_3$ : 7.26. Column chromatography was performed on silica gel 300-400 mesh. The unknown products were further characterized by HRMS (FT-ICR-MS) and electrospray ionization source in positive-ion mode.

### Experimental Procedure for the Synthesis of N-((methyl(phenyl)amino)methyl)benzamide

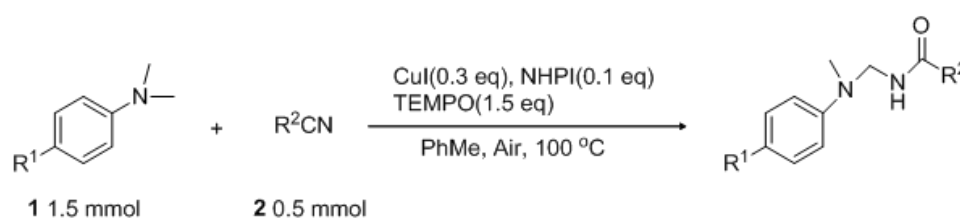

**1** (1.5 mmol, 3 equiv), **2** (0.5 mmol, 1 equiv), CuI (0.15 mmol, 30 mol%), NHPI (0.05 mmol, 30 mol%), TEMPO (0.75 mmol, 1.5 eq) and toluene (2.0 mL) were placed in a round bottom flask at room temperature. The reaction mixture was heated with stirring at 80 °C in the air for 16 hours. Upon completion, the reaction mixture was concentrated under vacuum. The residue was purified by silica gel column chromatography using a hexane/AcOEt (10:1-2:1, v/v) as the eluent to give the corresponding products.

## Spectral Data for Products

### N-((methyl(phenyl)amino)methyl)benzamide (**3a**)

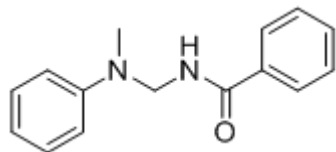

White solid.  $^1\text{H}$  NMR (400 MHz,  $\text{CDCl}_3$ )  $\delta$  (ppm) 7.64 (d,  $J = 7.8$  Hz, 2H), 7.39 (t,  $J = 7.1$  Hz, 1H), 7.31 (t,  $J = 7.4$  Hz, 2H), 7.21 – 7.17 (m, 2H), 6.79 – 6.72 (m, 3H), 6.55 (s, 1H), 5.03 (d,  $J = 5.5$  Hz, 2H), 2.98 (s, 3H).  $^{13}\text{C}$  NMR (100 MHz,  $\text{CDCl}_3$ )  $\delta$  (ppm) 168.1 (s), 148.0 (s), 134.3 (s), 131.8 (s), 129.6 (s), 128.7 (s), 127.1 (s), 118.4 (s), 113.4 (s), 58.3 (s), 38.1 (s). HRMS Calcd for  $\text{C}_{15}\text{H}_{16}\text{N}_2\text{NaO}^+$   $[\text{M}+\text{Na}]^+$  263.1155, found 263.1155.

### N-((methyl(phenyl)amino)methyl)-4-(trifluoromethyl)benzamide (**3b**)

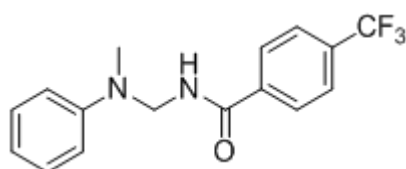

White solid.  $^1\text{H}$  NMR (400 MHz,  $\text{CDCl}_3$ )  $\delta$  (ppm) 7.83 (d,  $J = 9.1$  Hz, 2H), 7.64 (t,  $J = 9.0$  Hz, 2H), 7.33 – 7.29 (m, 2H), 6.93 – 6.84 (m, 4H), 5.13 (d,  $J = 5.5$  Hz, 2H), 3.10 (s, 3H).  $^{13}\text{C}$  NMR (100 MHz,  $\text{CDCl}_3$ )  $\delta$  (ppm) 166.9 (s), 147.9 (s), 137.5 (s), 133.4 (m,  $J_{\text{C-F}} = 31.4$  Hz), 129.6 (s), 127.6 (s), 125.6 (m,  $J_{\text{C-F}} = 3.7$  Hz), 123.7 (m,  $J_{\text{C-F}} = 272.7$  Hz), 118.5 (s), 113.4 (s), 58.5 (s), 38.1 (s). HRMS Calcd for  $\text{C}_{16}\text{H}_{15}\text{F}_3\text{N}_2\text{NaO}^+$   $[\text{M}+\text{Na}]^+$  331.1029, found 331.1031.

### 4-Fluoro-N-((methyl(phenyl)amino)methyl)benzamide (**3c**)

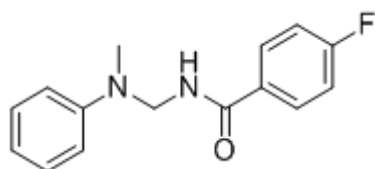

White solid.  $^1\text{H}$  NMR (400 MHz,  $\text{CDCl}_3$ )  $\delta$  (ppm) 7.74 – 7.71 (m, 2H), 7.28 – 7.25 (m, 2H), 7.06 – 7.03 (m, 2H), 6.86 – 6.80 (m, 3H), 6.65 (s, 1H), 5.08 (d,  $J = 5.6$  Hz, 2H), 3.05 (s, 3H).  $^{13}\text{C}$  NMR (100 MHz,  $\text{CDCl}_3$ )  $\delta$  (ppm) 167.0 (s), 164.9 (d,  $J_{\text{C-F}} = 252.3$  Hz), 147.9 (s), 130.4 (d,  $J_{\text{C-F}} = 3.5$  Hz), 129.6 (s), 129.5 (m,  $J_{\text{C-F}} = 8.9$  Hz), 118.4 (s), 115.7 (m,  $J_{\text{C-F}} = 272.7$  Hz), 113.3 (s), 58.4 (s), 38.1 (s). HRMS Calcd for  $\text{C}_{15}\text{H}_{15}\text{FN}_2\text{NaO}^+$   $[\text{M}+\text{Na}]^+$  281.1061, found 281.1059.

### 4-Chloro-N-((methyl(phenyl)amino)methyl)benzamide (**3d**)

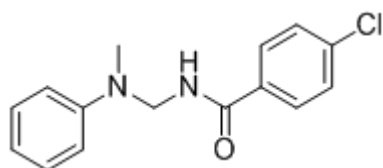

White solid.  $^1\text{H}$  NMR (400 MHz,  $\text{CDCl}_3$ )  $\delta$  (ppm) 7.65 – 7.62 (m, 2H), 7.34 – 7.31 (m, 2H), 7.27

– 7.24 (m, 2H), 6.85 – 6.77 (m, 4H), 5.06 (d,  $J = 5.5$  Hz, 2H), 3.04 (s, 3H).  $^{13}\text{C}$  NMR (100 MHz,  $\text{CDCl}_3$ )  $\delta$  (ppm) 167.1 (s), 147.9 (s), 138.0 (s), 132.5 (s), 129.6 (s), 128.9 (s), 128.6 (s), 118.4 (s), 113.3 (s), 58.3 (s), 38.1 (s). HRMS Calcd for  $\text{C}_{15}\text{H}_{15}\text{ClN}_2\text{NaO}^+$   $[\text{M}+\text{Na}]^+$  297.0765, found 297.0758.

4-Bromo-N-((methyl(phenyl)amino)methyl)benzamide (**3e**)

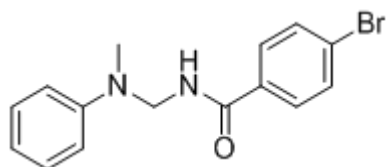

White solid.  $^1\text{H}$  NMR (400 MHz,  $\text{CDCl}_3$ )  $\delta$  (ppm) 7.59 – 7.56 (m, 2H), 7.53 – 7.51 (m, 2H), 7.29 – 7.25 (m, 2H), 6.86 – 6.81 (m, 3H), 6.59 (s, 1H), 5.09 (d,  $J = 5.6$  Hz, 2H), 3.04 (s, 3H).  $^{13}\text{C}$  NMR (100 MHz,  $\text{CDCl}_3$ )  $\delta$  (ppm) 167.1 (s), 147.9 (s), 133.0 (s), 131.99 (s), 131.93 (s), 129.7 (s), 126.5 (s), 118.5 (s), 113.4 (s), 58.4 (s), 38.2 (s). HRMS Calcd for  $\text{C}_{15}\text{H}_{15}\text{BrN}_2\text{NaO}^+$   $[\text{M}+\text{Na}]^+$  341.0260, found 341.0257.

4-Butoxy-N-((methyl(phenyl)amino)methyl)benzamide (**3f**)

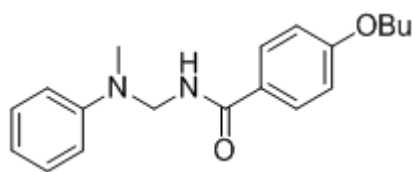

White solid.  $^1\text{H}$  NMR (400 MHz,  $\text{CDCl}_3$ )  $\delta$  (ppm) 7.67 (d,  $J = 8.1$  Hz, 2H), 7.25 (t,  $J = 7.4$  Hz, 2H), 6.85 – 6.71 (m, 6H), 5.05 (d,  $J = 5.4$  Hz, 2H), 3.94 (t,  $J = 6.5$  Hz, 2H), 3.02 (s, 3H), 1.77 – 1.72 (m, 2H), 1.51 – 1.43 (m, 2H), 0.96 (t,  $J = 7.4$  Hz, 3H).  $^{13}\text{C}$  NMR (100 MHz,  $\text{CDCl}_3$ )  $\delta$  (ppm) 167.6 (s), 162.0 (s), 148.1 (s), 129.5 (s), 128.9 (s), 126.1 (s), 118.1 (s), 114.3 (s), 113.3 (s), 67.9 (s), 58.2 (s), 38.0 (s), 31.2 (s), 19.2 (s), 13.8 (s). HRMS Calcd for  $\text{C}_{19}\text{H}_{24}\text{N}_2\text{NaO}^+$   $[\text{M}+\text{Na}]^+$  335.1730, found 335.1726.

4-Methoxy-N-((methyl(phenyl)amino)methyl)benzamide (**3g**)

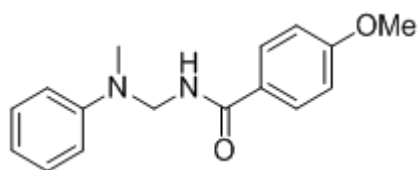

White solid.  $^1\text{H}$  NMR (400 MHz,  $\text{CDCl}_3$ )  $\delta$  (ppm) 7.71 – 7.67 (m, 2H), 7.29 – 7.25 (m, 2H), 6.89 – 6.79 (m, 5H), 6.54 (s, 1H), 5.09 (d,  $J = 5.6$  Hz, 2H), 3.81 (s, 3H), 3.05 (s, 3H).  $^{13}\text{C}$  NMR (100 MHz,  $\text{CDCl}_3$ )  $\delta$  (ppm) 167.5 (s), 162.4 (s), 148.1 (s), 129.6 (s), 128.9 (s), 126.4 (s), 118.3 (s), 113.9 (s), 113.3 (s), 58.2 (s), 55.5 (s), 38.1 (s). HRMS Calcd for  $\text{C}_{16}\text{H}_{18}\text{N}_2\text{NaO}^+$   $[\text{M}+\text{Na}]^+$  293.1260, found 293.1253.

3-Methoxy-N-((methyl(phenyl)amino)methyl)benzamide (**3h**)

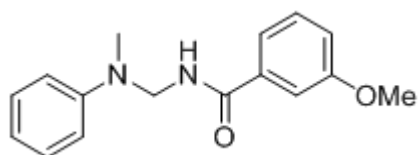

White solid.  $^1\text{H}$  NMR (400 MHz,  $\text{CDCl}_3$ )  $\delta$  (ppm) 7.32 (s, 1H), 7.26 – 7.21 (m, 4H), 7.00 – 6.98 (m, 1H), 6.85 – 6.78 (m, 4H), 5.06 (d,  $J = 5.5$  Hz, 2H), 3.09 (s, 3H), 3.04 (s, 3H).  $^{13}\text{C}$  NMR (100 MHz,  $\text{CDCl}_3$ )  $\delta$  (ppm) 167.9 (s), 159.8 (s), 148.0 (s), 135.7 (s), 129.6 (s), 129.5 (s), 118.8 (s), 118.2 (s), 117.9 (s), 113.3 (s), 112.5 (s), 58.3 (s), 55.4 (s), 38.0 (s). HRMS Calcd for  $\text{C}_{16}\text{H}_{18}\text{N}_2\text{NaO}^+$   $[\text{M}+\text{Na}]^+$  293.1260, found 293.1255.

2-Methoxy-N-((methyl(phenyl)amino)methyl)benzamide (**3i**)

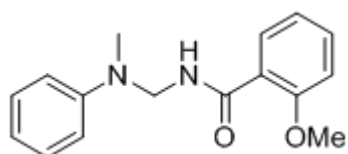

White solid.  $^1\text{H}$  NMR (400 MHz,  $\text{CDCl}_3$ )  $\delta$  (ppm) 8.32 (s, 1H), 8.20 – 8.18 (m, 1H), 7.44 – 7.40 (m, 1H), 7.31 – 7.26 (m, 2H), 7.08 – 7.05 (m, 1H), 6.92 – 6.87 (m, 3H), 6.83 – 6.80 (m, 1H), 5.13 (d,  $J = 5.6$  Hz, 2H), 3.76 (s, 3H), 3.06 (s, 3H).  $^{13}\text{C}$  NMR (100 MHz,  $\text{CDCl}_3$ )  $\delta$  (ppm) 165.8 (s), 157.6 (s), 148.4 (s), 133.1 (s), 132.3 (s), 129.4 (s), 121.42 (s), 121.40 (s), 118.2 (s), 113.6 (s), 111.5 (s), 57.9 (s), 56.0 (s), 38.2 (s). HRMS Calcd for  $\text{C}_{16}\text{H}_{18}\text{N}_2\text{NaO}^+$   $[\text{M}+\text{Na}]^+$  293.1260, found 293.1263.

N-((methyl(phenyl)amino)methyl)-2-naphthamide (**3j**)

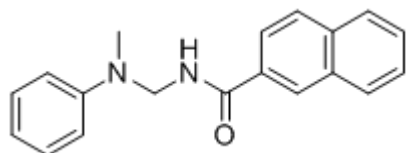

White solid.  $^1\text{H}$  NMR (400 MHz,  $\text{CDCl}_3$ )  $\delta$  (ppm) 8.27 - 8.25 (m, 1H), 7.91 - 7.85 (m, 2H), 7.54 - 7.51 (m, 3H), 7.42 - 7.38 (m, 1H), 7.33 - 7.29 (m, 2H), 6.92 (d,  $J = 8.0$  Hz, 2H), 6.86 (t,  $J = 7.7$  Hz, 1H), 6.59 (s, 1H), 5.18 (d,  $J = 5.7$  Hz, 2H), 3.14 (s, 3H).  $^{13}\text{C}$  NMR (100 MHz,  $\text{CDCl}_3$ )  $\delta$  (ppm) 170.1 (s), 147.9 (s), 134.2 (s), 133.7 (s), 130.8 (s), 130.1 (s), 129.6 (s), 128.4 (s), 127.2 (s), 126.5 (s), 125.4 (s), 125.0 (s), 124.7 (s), 118.5 (s), 113.6 (s), 58.0 (s), 38.2 (s). HRMS Calcd for  $\text{C}_{19}\text{H}_{18}\text{N}_2\text{NaO}^+$   $[\text{M}+\text{Na}]^+$  313.1311, found 313.1301.

N-((methyl(phenyl)amino)methyl)-[1,1'-biphenyl]-4-carboxamide (**3k**)

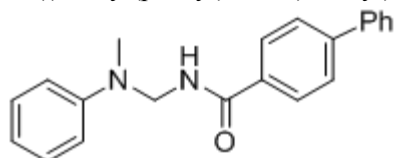

White solid.  $^1\text{H}$  NMR (400 MHz,  $\text{CDCl}_3$ )  $\delta$  (ppm) 7.82 - 7.80 (m, 2H), 7.64 - 7.58 (m, 4H), 7.47 - 7.38 (m, 3H), 7.32 - 7.26 (m, 2H), 6.90 - 6.83 (m, 3H), 6.63 (s, 1H), 5.16 (d,  $J = 5.6$  Hz, 2H), 3.09 (s, 3H).  $^{13}\text{C}$  NMR (100 MHz,  $\text{CDCl}_3$ )  $\delta$  (ppm) 167.8 (s), 148.1 (s), 144.7 (s), 140.1 (s), 132.9 (s), 129.7 (s), 129.0 (s), 128.2 (s), 127.7 (s), 126.4 (s), 125.3 (s), 118.4 (s), 113.4 (s), 58.4 (s), 38.1 (s). HRMS Calcd for  $\text{C}_{21}\text{H}_{20}\text{N}_2\text{NaO}^+$   $[\text{M}+\text{Na}]^+$  339.1468, found 339.1458.

N-((methyl(phenyl)amino)methyl)acetamide (**3l**)

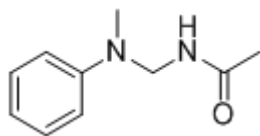

Yellow liquid.  $^1\text{H}$  NMR (400 MHz,  $\text{CDCl}_3$ )  $\delta$  (ppm) 7.28 (d,  $J = 7.4$  Hz, 2H), 6.82 (t,  $J = 4.5$  Hz, 3H), 6.20 (s, 1H), 4.90 (d,  $J = 5.7$  Hz, 2H), 3.01 (s, 3H), 1.97 (s, 3H).  $^{13}\text{C}$  NMR (100 MHz,  $\text{CDCl}_3$ )  $\delta$  (ppm) 170.7 (s), 148.0 (s), 129.5 (s), 118.2 (s), 113.2 (s), 57.5 (s), 37.9 (s), 23.3 (s). HRMS Calcd for  $\text{C}_{10}\text{H}_{14}\text{N}_2\text{NaO}^+$   $[\text{M}+\text{Na}]^+$  201.0998, found 201.0996.

N-((methyl (phenyl)amino)methyl)butyramide (**3m**)

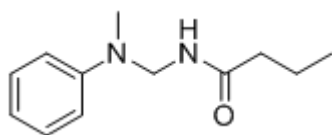

Yellow liquid.  $^1\text{H}$  NMR (400 MHz,  $\text{CDCl}_3$ )  $\delta$  (ppm) 7.29 (t,  $J = 7.7$  Hz, 2H), 6.84 - 6.81 (m, 3H), 6.06 (s, 1H), 4.92 (d,  $J = 5.7$  Hz, 2H), 3.01 (s, 3H), 2.15 (t,  $J = 8.9$  Hz, 2H), 1.71 - 1.62 (m, 2H), 0.94 (t,  $J = 8.0$  Hz, 3H).  $^{13}\text{C}$  NMR (100 MHz,  $\text{CDCl}_3$ )  $\delta$  (ppm) 170.7 (s), 148.0 (s), 129.5 (s), 118.2 (s), 113.2 (s), 57.5 (s), 37.9 (s), 23.3 (s). HRMS Calcd for  $\text{C}_{12}\text{H}_{18}\text{N}_2\text{NaO}^+$   $[\text{M}+\text{Na}]^+$  229.1311, found 229.1311.

N-((methyl(phenyl)amino)methyl)cyclohexanecarboxamide (**3n**)

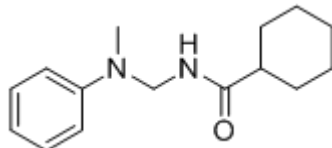

White solid.  $^1\text{H}$  NMR (400 MHz,  $\text{CDCl}_3$ )  $\delta$  (ppm) 7.29 (t,  $J = 7.7$  Hz, 2H), 6.82 (t,  $J = 4.9$  Hz, 3H), 5.97 (s, 1H), 4.92 (d,  $J = 5.6$  Hz, 2H), 3.00 (s, 3H), 2.09 - 2.03 (m, 1H), 1.84 - 1.68 (m, 5H), 1.49 - 1.41 (m, 2H), 1.28 - 1.22 (m, 3H).  $^{13}\text{C}$  NMR (100 MHz,  $\text{CDCl}_3$ )  $\delta$  (ppm) 176.7 (s), 148.0 (s), 129.5 (s), 118.1 (s), 113.3 (s), 57.4 (s), 45.7 (s), 37.8 (s), 29.7 (s), 25.74 (s), 25.71 (s). HRMS Calcd for  $\text{C}_{15}\text{H}_{22}\text{N}_2\text{NaO}^+$   $[\text{M}+\text{Na}]^+$  269.1624, found 269.1619.

N-((methyl (phenyl)amino)methyl)-2-phenylacetamide (**3o**)

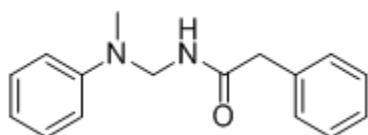

White solid.  $^1\text{H}$  NMR (400 MHz,  $\text{CDCl}_3$ )  $\delta$  (ppm) 7.27 - 7.14 (m, 7H), 6.77 - 6.71 (m, 3H), 6.26 (s, 1H), 4.78 (d,  $J = 5.7$  Hz, 2H), 3.45 (s, 2H), 2.89 (s, 3H).  $^{13}\text{C}$  NMR (100 MHz,  $\text{CDCl}_3$ )  $\delta$  (ppm) 171.6 (s), 147.9 (s), 134.8 (s), 129.3 (s), 129.2 (s), 128.8 (s), 127.2 (s), 118.2 (s), 113.3 (s), 57.7 (s), 43.5 (s), 37.8 (s). HRMS Calcd for  $\text{C}_{16}\text{H}_{18}\text{N}_2\text{NaO}^+$   $[\text{M}+\text{Na}]^+$  277.1311, found 277.1307.

N-((methyl(phenyl)amino)methyl)-4-phenylbutanamide (**3p**)

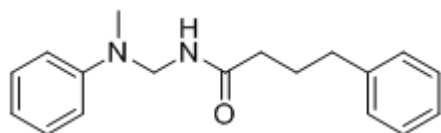

Yellow liquid.  $^1\text{H}$  NMR (400 MHz,  $\text{CDCl}_3$ )  $\delta$  (ppm) 7.33 - 7.27 (m, 4H), 7.23 - 7.15 (m, 3H), 6.87 - 6.83 (m, 3H), 6.04 (s, 1H), 4.93 (d,  $J = 5.8$  Hz, 2H), 3.06 (s, 3H), 2.66 (t,  $J = 7.4$  Hz, 2H), 2.18 (t,  $J = 7.2$  Hz, 2H), 2.03 - 1.95 (m, 2H).  $^{13}\text{C}$  NMR (100 MHz,  $\text{CDCl}_3$ )  $\delta$  (ppm) 173.3 (s), 147.9 (s), 141.4 (s), 129.5 (s), 128.5 (s), 128.4 (s), 126.0 (s), 118.2 (s), 113.3 (s), 57.4 (s), 38.0 (s), 35.8 (s), 35.1 (s), 27.0 (s). HRMS Calcd for  $\text{C}_{18}\text{H}_{22}\text{N}_2\text{NaO}^+$   $[\text{M}+\text{Na}]^+$  305.1624, found 305.1621.

N-((methyl(phenyl)amino)methyl)octanamide (**3q**)

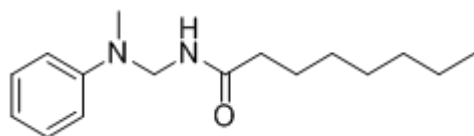

Yellow liquid.  $^1\text{H}$  NMR (400 MHz,  $\text{CDCl}_3$ )  $\delta$  (ppm) 7.31 - 7.27 (m, 2H), 6.84 - 6.81 (m, 3H), 5.91 (s, 1H), 4.94 (d,  $J = 5.7$  Hz, 2H), 3.02 (s, 3H), 2.26 - 2.15 (m, 2H), 1.67 - 1.60 (m, 2H), 1.33 - 1.28 (m, 8H), 0.89 (t,  $J = 5.9$  Hz, 3H).  $^{13}\text{C}$  NMR (100 MHz,  $\text{CDCl}_3$ )  $\delta$  (ppm) 173.8 (s), 148.1 (s), 129.65 (s), 118.3 (s), 113.4 (s), 57.5 (s), 38.0 (s), 36.9 (s), 31.8 (s), 29.3 (s), 29.1 (s), 25.7 (s), 22.7 (s), 14.2 (s). HRMS Calcd for  $\text{C}_{16}\text{H}_{26}\text{N}_2\text{NaO}^+$   $[\text{M}+\text{Na}]^+$  285.1937, found 285.1934.

N-((methyl(phenyl)amino)methyl)dodecanamide (**3r**)

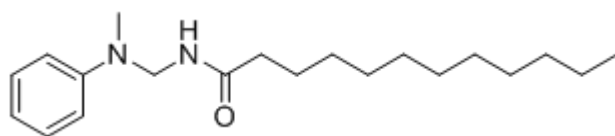

Yellow liquid.  $^1\text{H}$  NMR (400 MHz,  $\text{CDCl}_3$ )  $\delta$  (ppm) 7.31 - 7.26 (m, 2H), 6.85 - 6.82 (m, 3H), 5.91 (s, 1H), 4.94 (d,  $J = 5.8$  Hz, 2H), 3.02 (s, 3H), 2.17 (t,  $J = 7.4$  Hz, 2H), 1.64 - 1.59 (m, 2H), 1.27 (s, 16H), 0.91 (t,  $J = 6.7$  Hz, 3H).  $^{13}\text{C}$  NMR (100 MHz,  $\text{CDCl}_3$ )  $\delta$  (ppm) 173.8 (s), 148.0 (s), 129.6 (s), 118.3 (s), 113.4 (s), 57.4 (s), 38.0 (s), 36.9 (s), 32.0 (s), 29.7 (s), 29.5 (s), 29.4 (s), 25.7 (s), 22.8 (s), 14.3 (s). HRMS Calcd for  $\text{C}_{20}\text{H}_{34}\text{N}_2\text{NaO}^+$   $[\text{M}+\text{Na}]^+$  341.2563, found 341.2554.

N-(((4-methoxyphenyl)(methyl)amino)methyl)benzamide (**3s**)

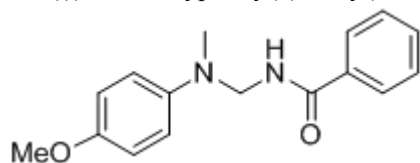

White solid.  $^1\text{H}$  NMR (400 MHz,  $\text{CDCl}_3$ )  $\delta$  (ppm) 7.72 - 7.70 (m, 2H), 7.50 - 7.46 (m, 1H), 7.41 - 7.37 (m, 2H), 6.86 (s, 4H), 6.57 (s, 1H), 5.04 (d,  $J = 5.6$  Hz, 2H), 3.76 (s, 3H), 2.97 (s, 3H).  $^{13}\text{C}$  NMR (100 MHz,  $\text{CDCl}_3$ )  $\delta$  (ppm) 168.0 (s), 153.1 (s), 142.5 (s), 134.4 (s), 131.8 (s), 128.7 (s), 127.1 (s), 115.9 (s), 115.1 (s), 59.4 (s), 55.8 (s), 38.4 (s). HRMS Calcd for  $\text{C}_{16}\text{H}_{19}\text{N}_2\text{O}_2^+$   $[\text{M}+\text{H}]^+$  271.1441, found 271.1436.

N-((methyl(p-tolyl)amino)methyl)benzamide (**3t**)

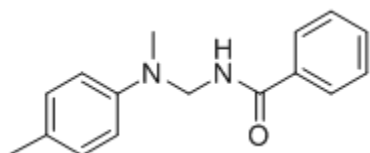

White solid.  $^1\text{H}$  NMR (400 MHz,  $\text{CDCl}_3$ )  $\delta$  (ppm) 7.72 (d,  $J = 7.3$  Hz, 2H), 7.50 - 7.38 (m, 3H), 7.09 (d,  $J = 8.3$  Hz, 2H), 6.80 (d,  $J = 8.9$  Hz, 2H), 6.56 (s, 1H), 5.09 (d,  $J = 5.5$  Hz, 2H), 3.03 (s, 3H), 2.28 (s, 3H).  $^{13}\text{C}$  NMR (100 MHz,  $\text{CDCl}_3$ )  $\delta$  (ppm) 168.1 (s), 145.9 (s), 134.4 (s), 131.8 (s), 130.1 (s), 128.7 (s), 127.9 (s), 127.1 (s), 113.9 (s), 58.7 (s), 38.2 (s), 20.4 (s). HRMS Calcd for  $\text{C}_{16}\text{H}_{18}\text{N}_2\text{NaO}^+$   $[\text{M}+\text{Na}]^+$  277.1311, found 277.1305.



# <sup>1</sup>H NMR and <sup>13</sup>C NMR Spectra for All Compounds

3a

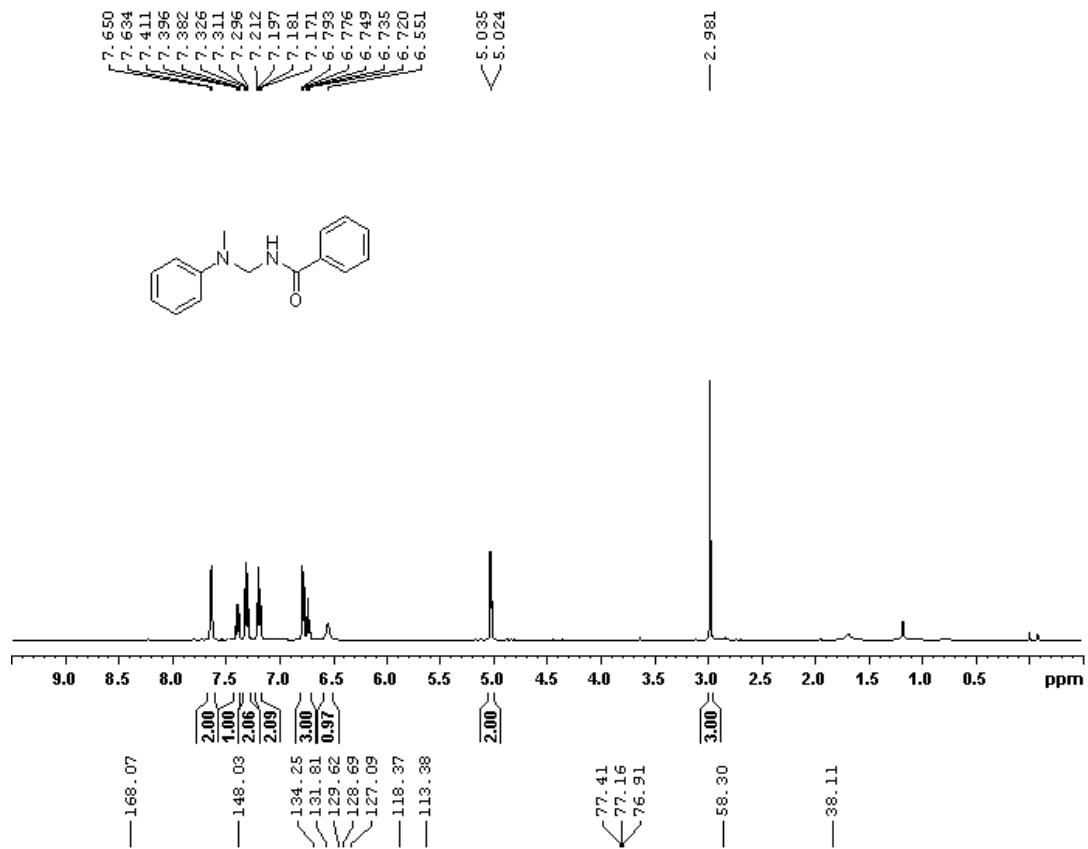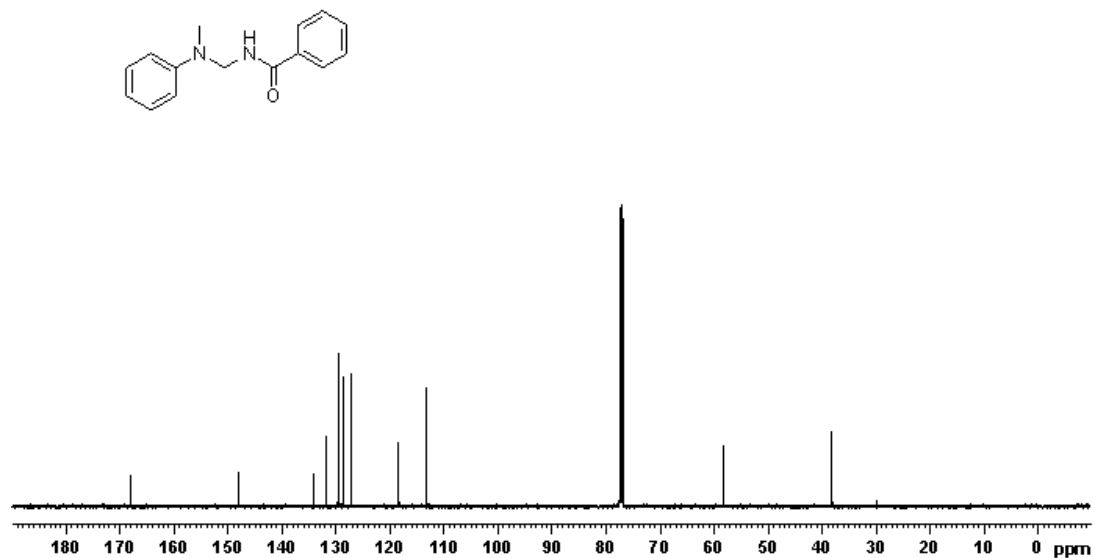

3b

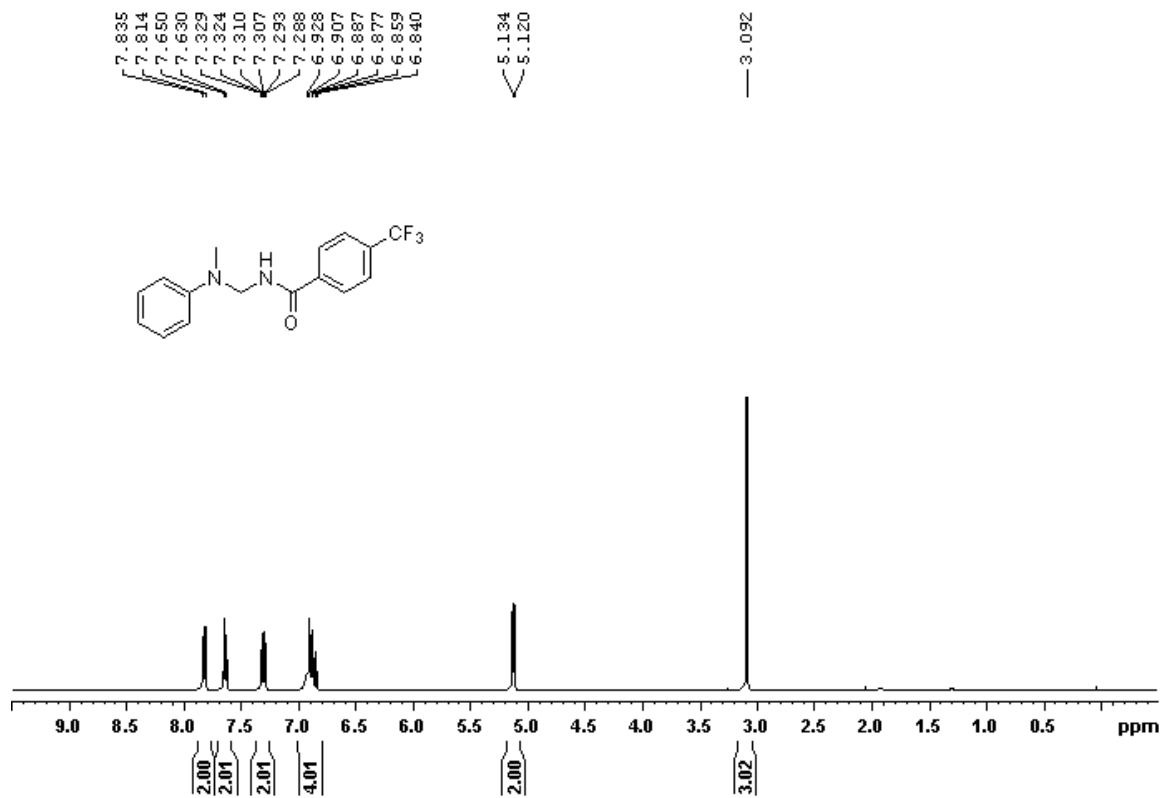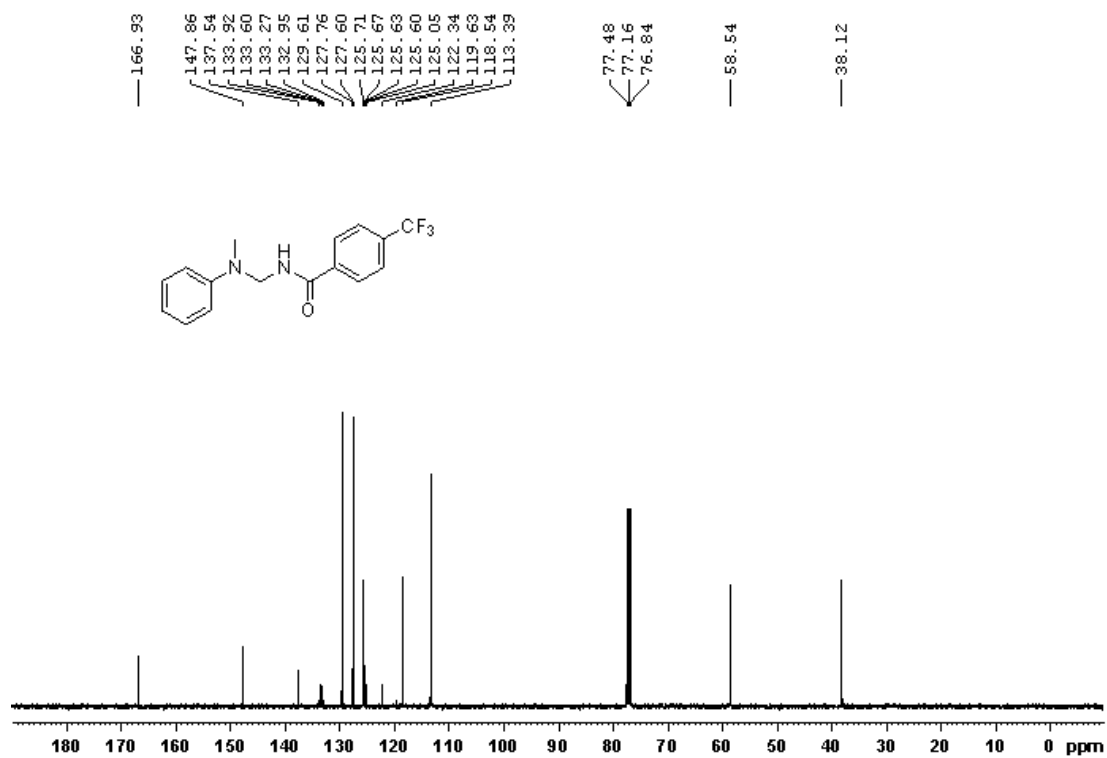

3c

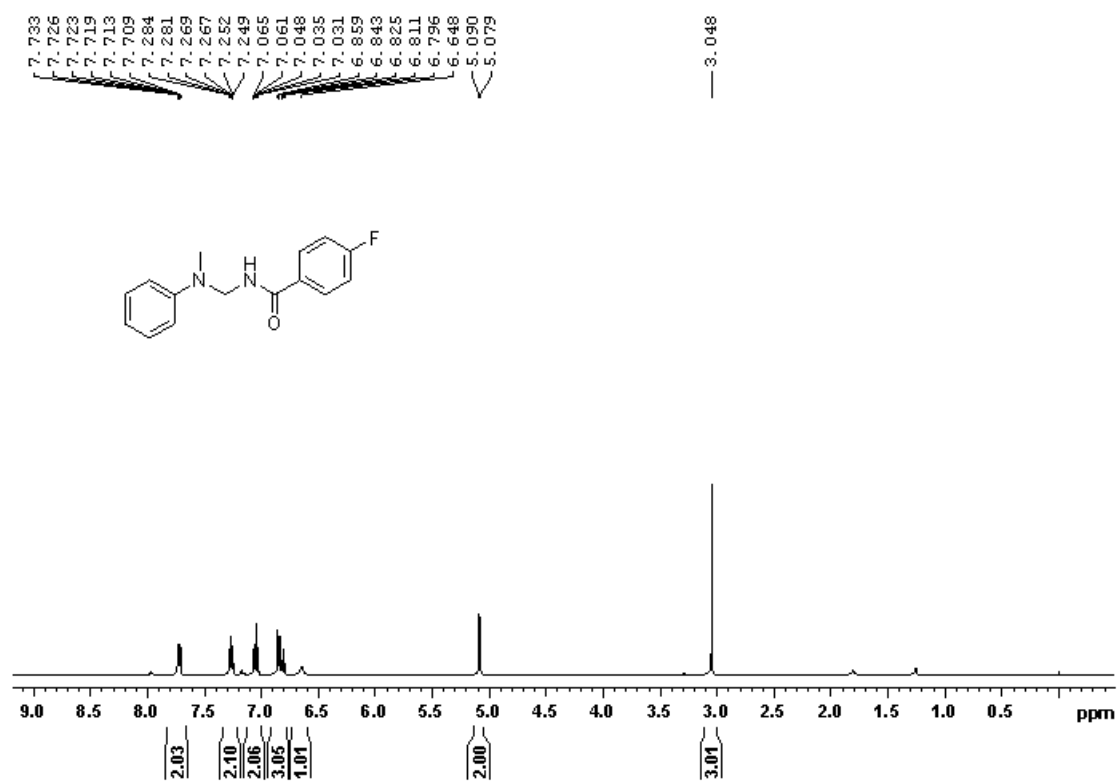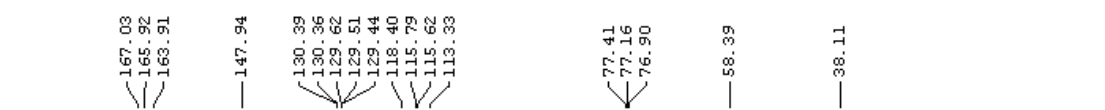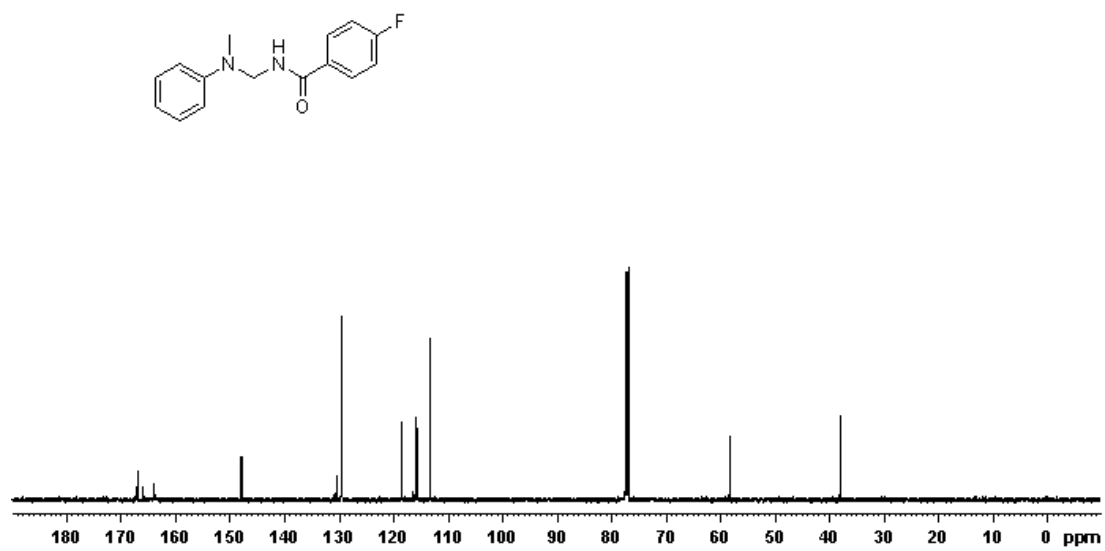

3d

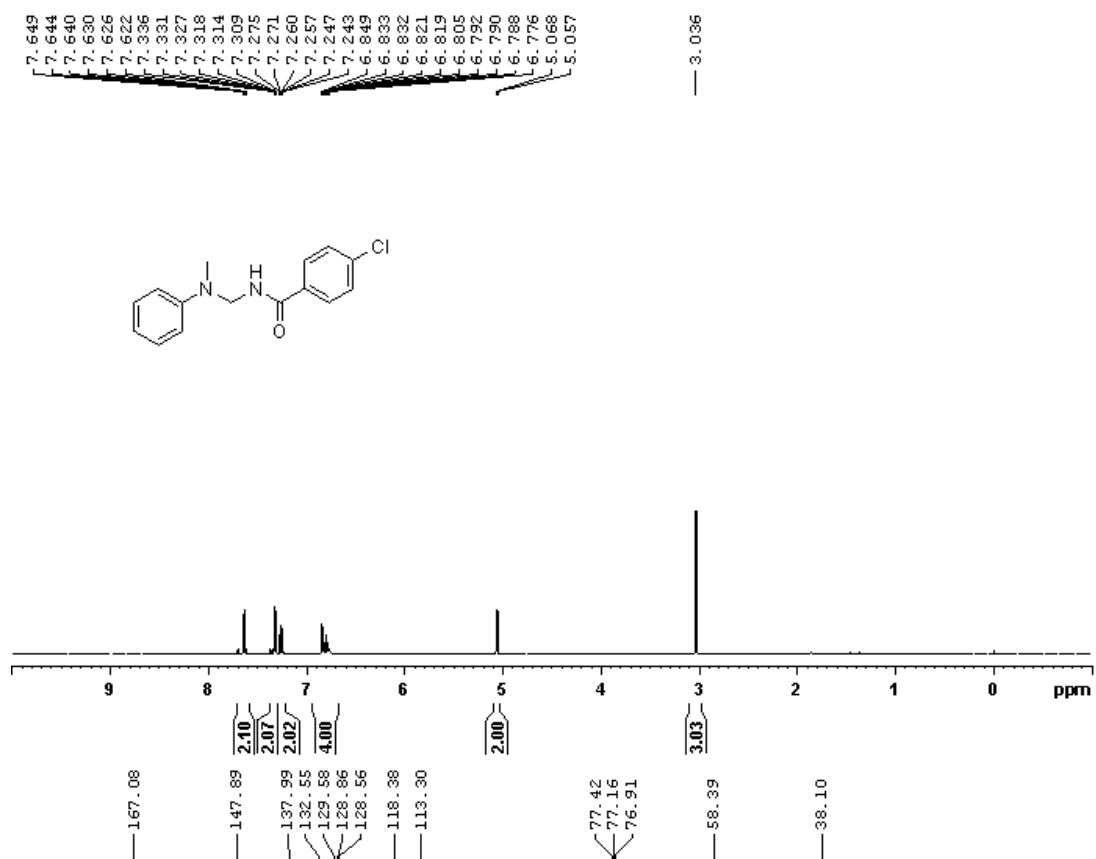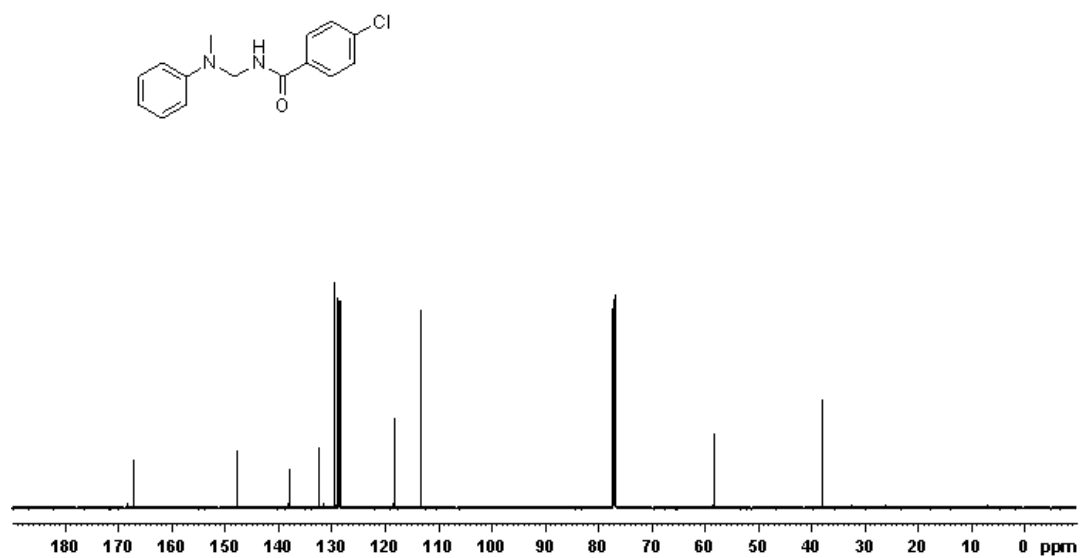

3e

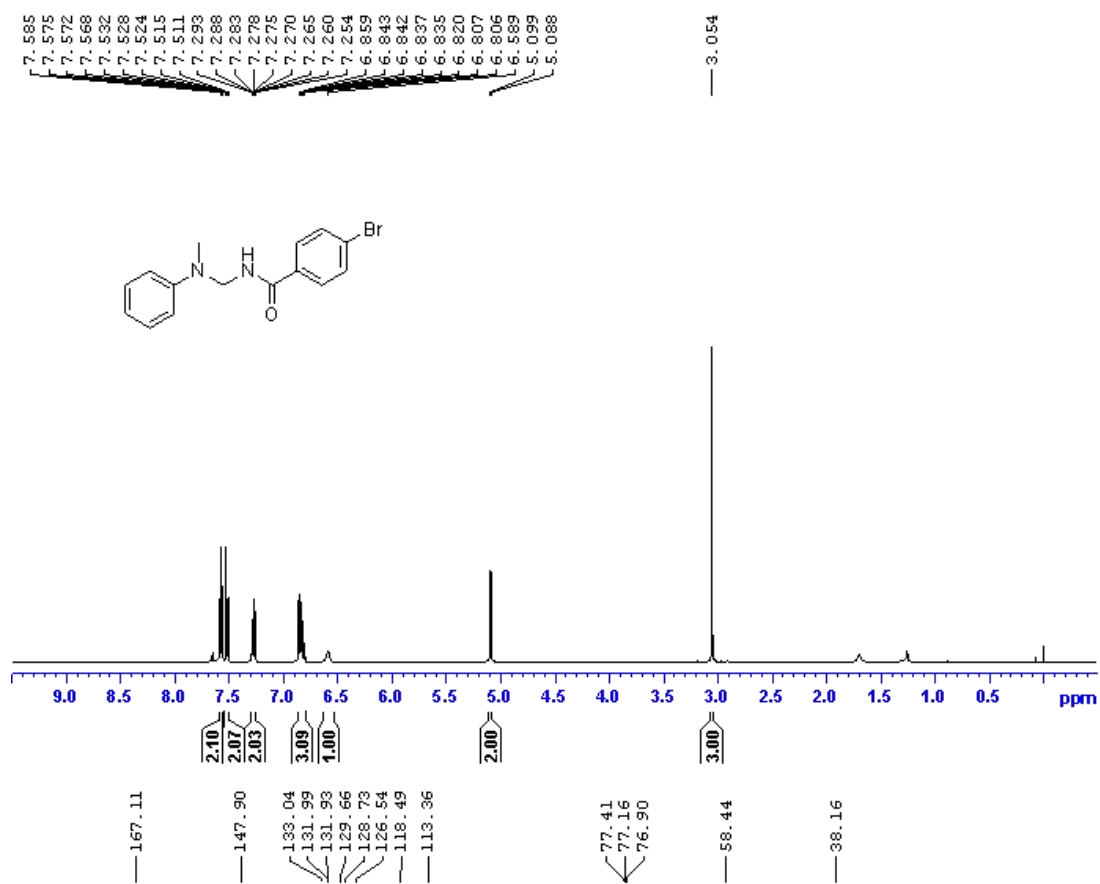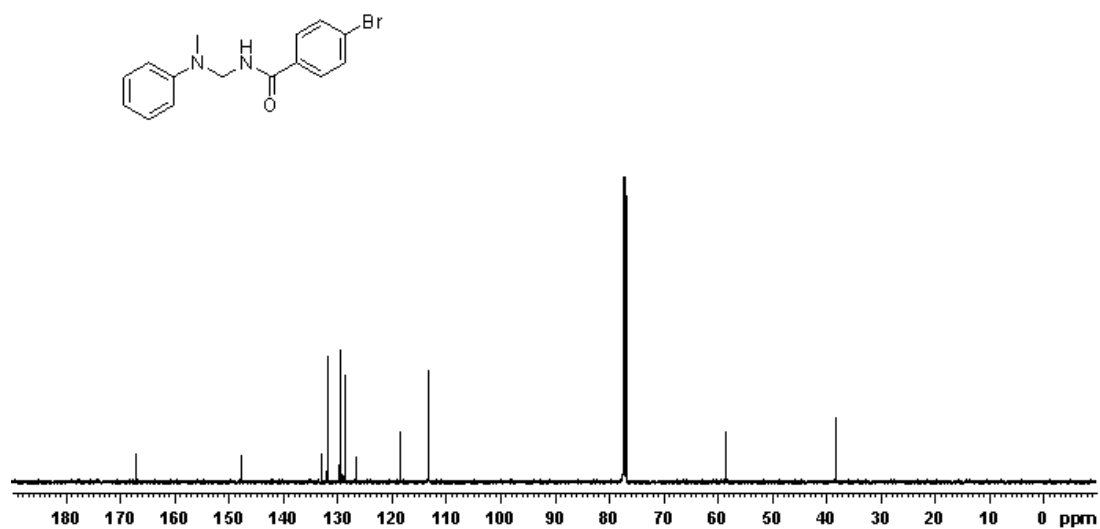

3f

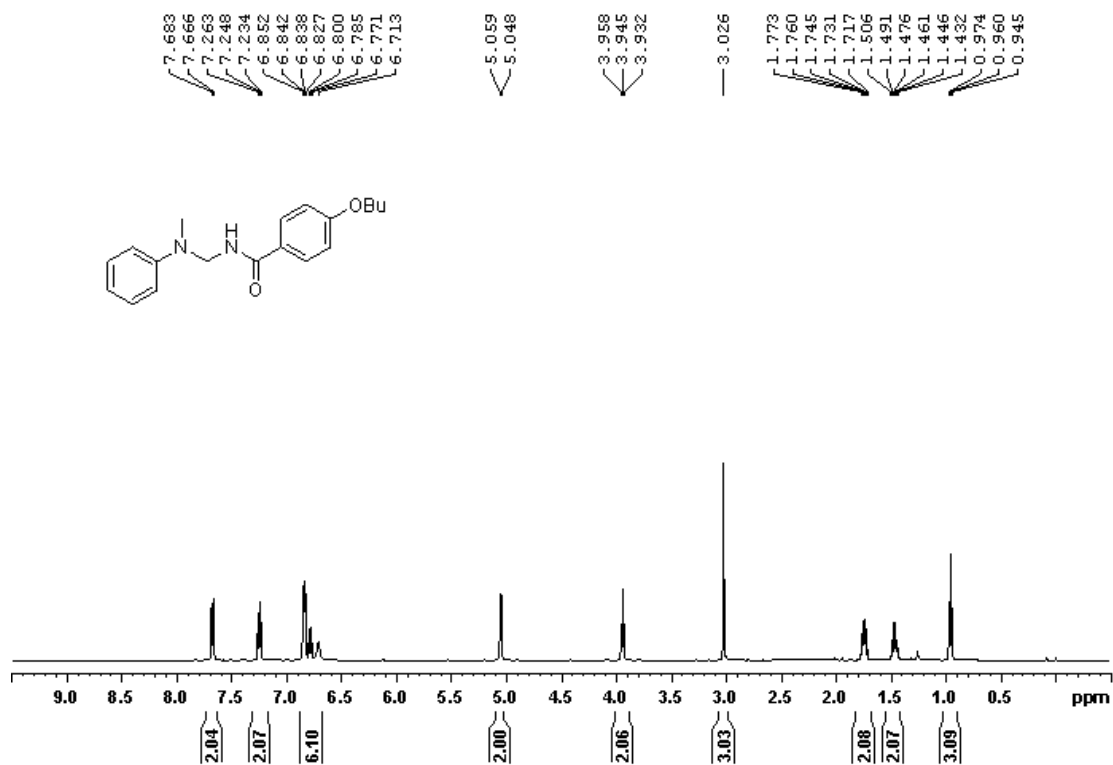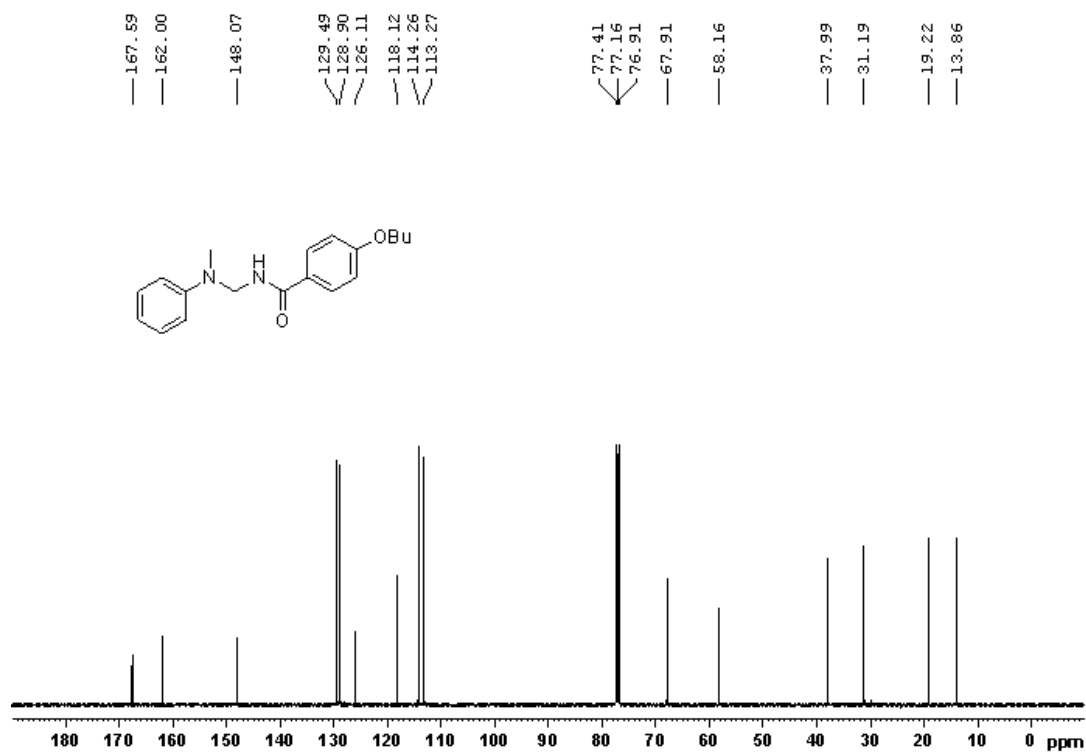

3h

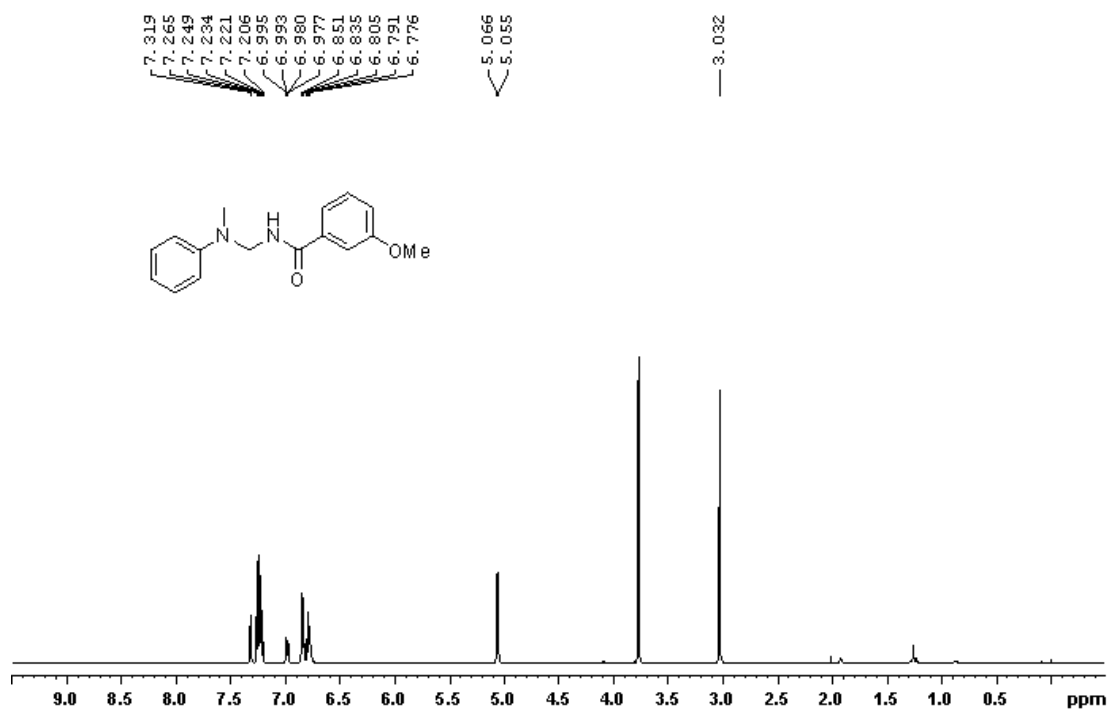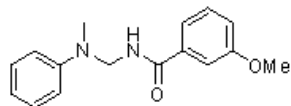

167.91  
159.85  
147.96  
135.66  
129.59  
129.51  
118.85  
118.24  
117.87  
113.29  
112.50  
77.42  
77.16  
76.91  
58.26  
55.44  
38.03

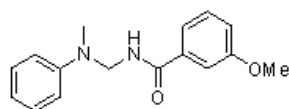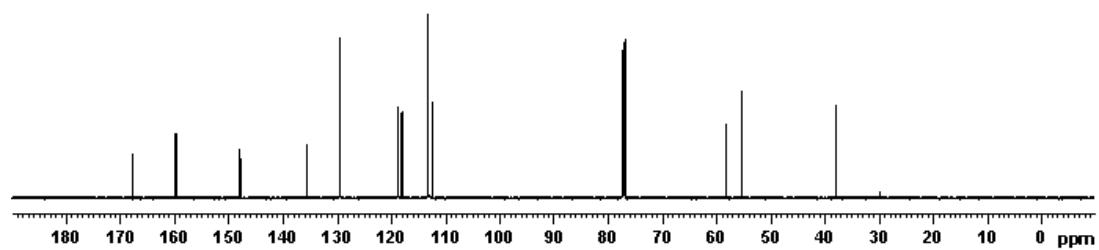

3i

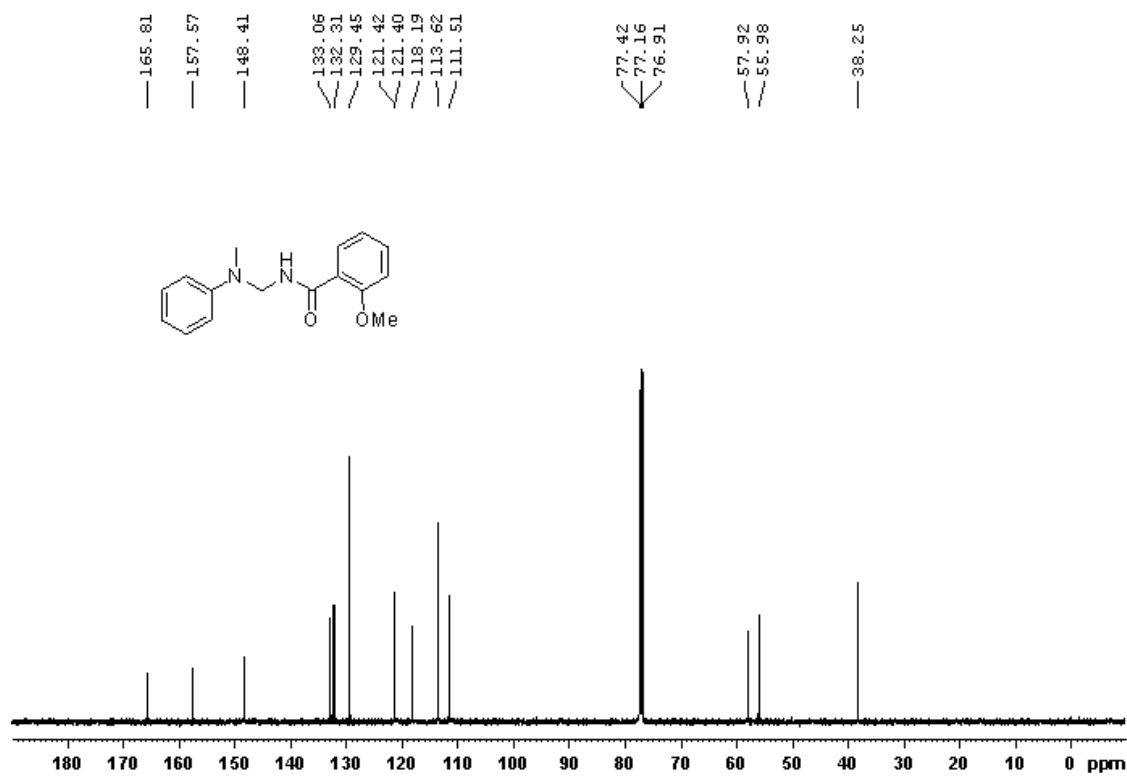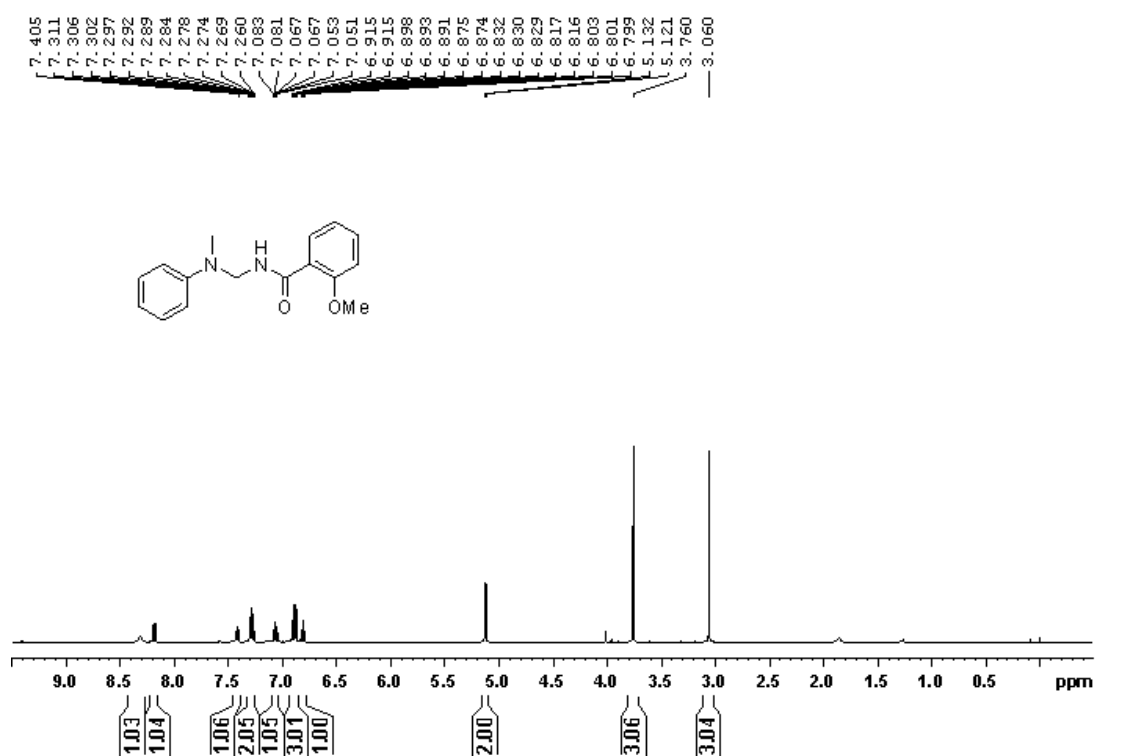



3j

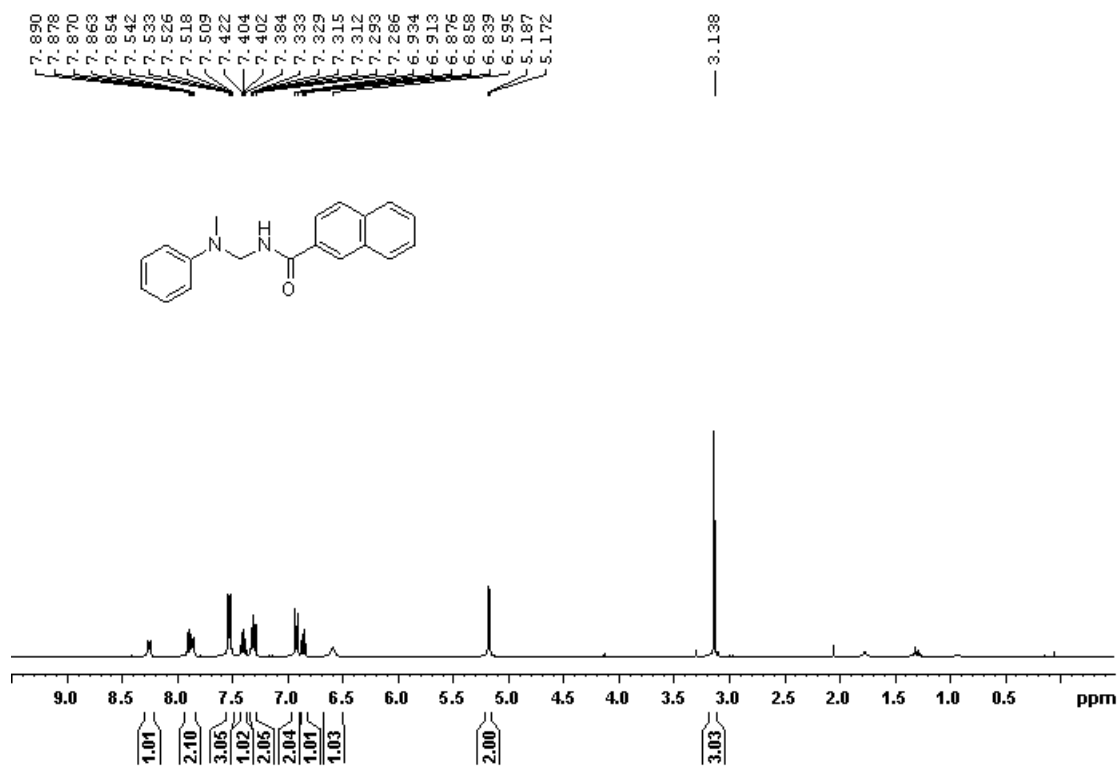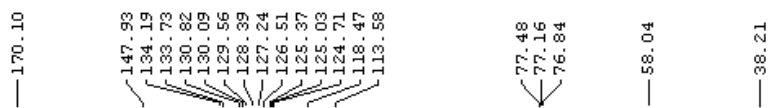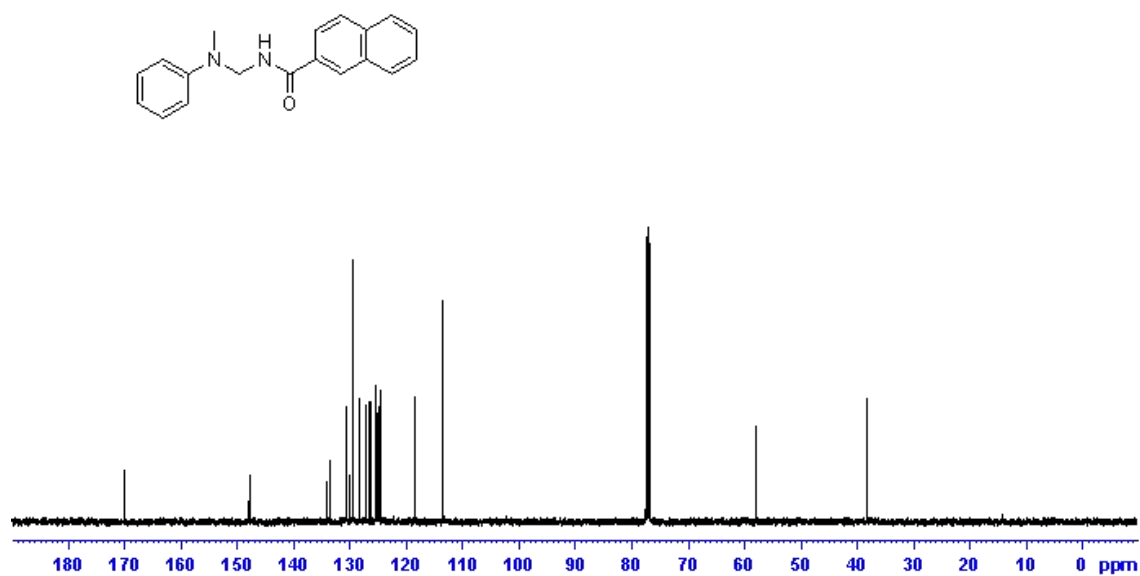

3k

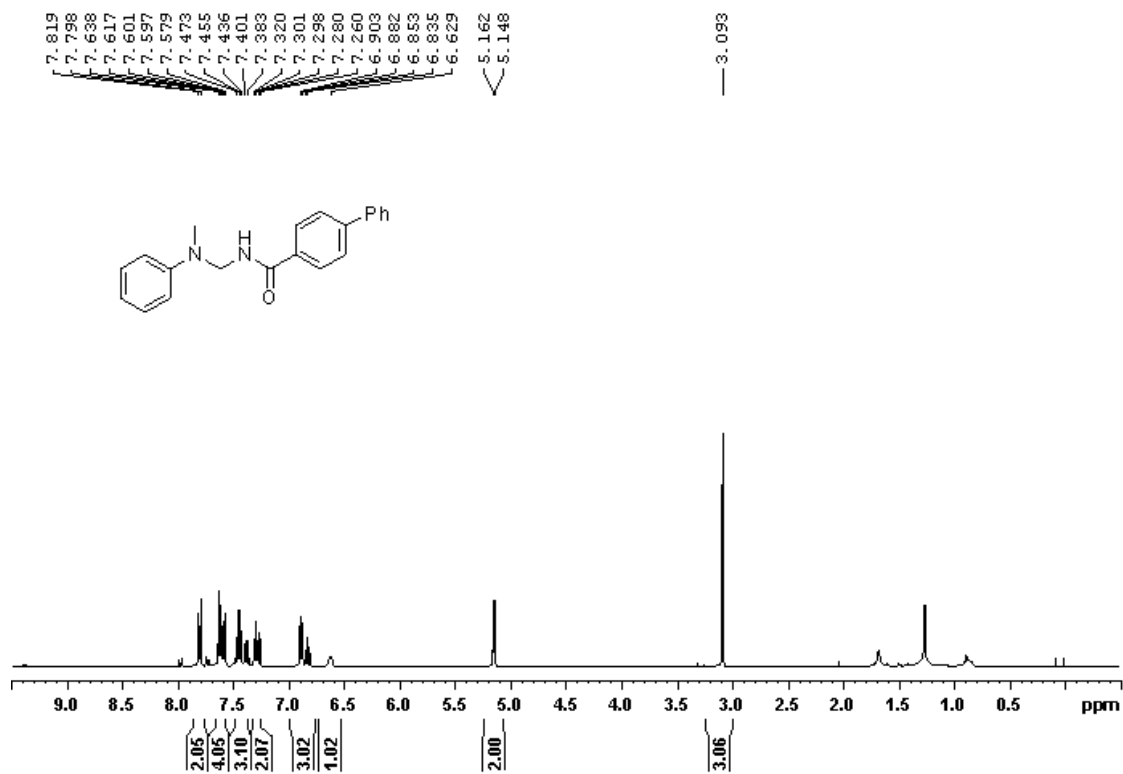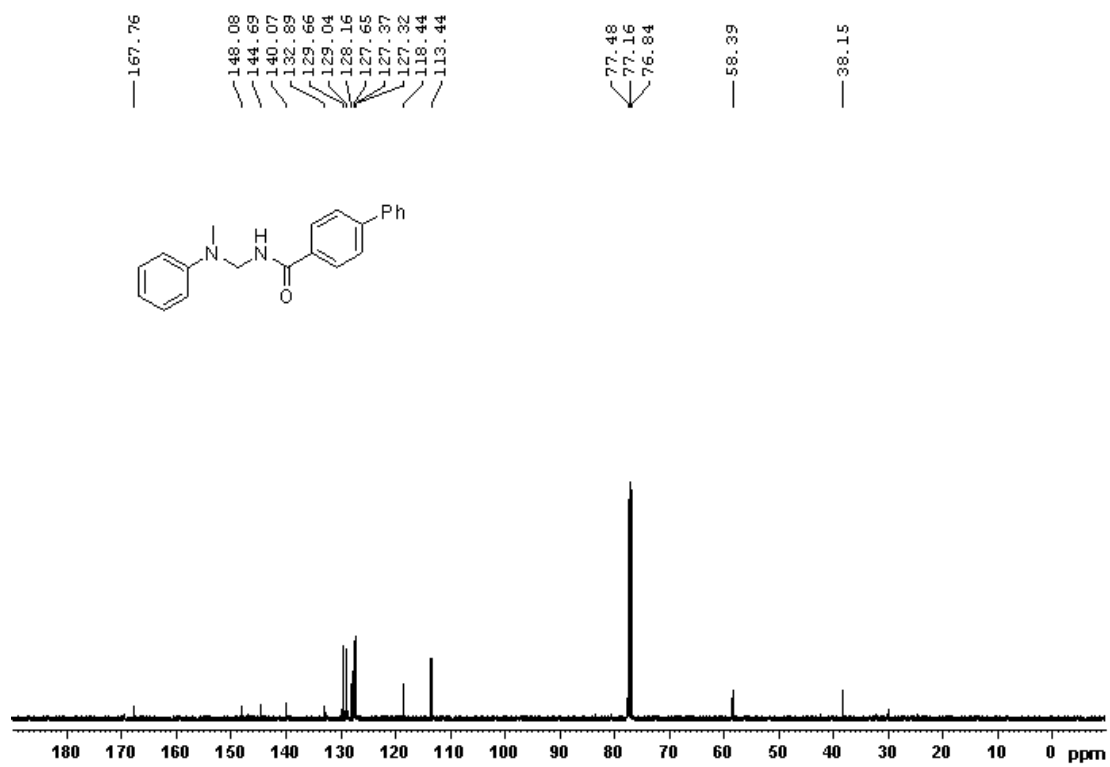

31

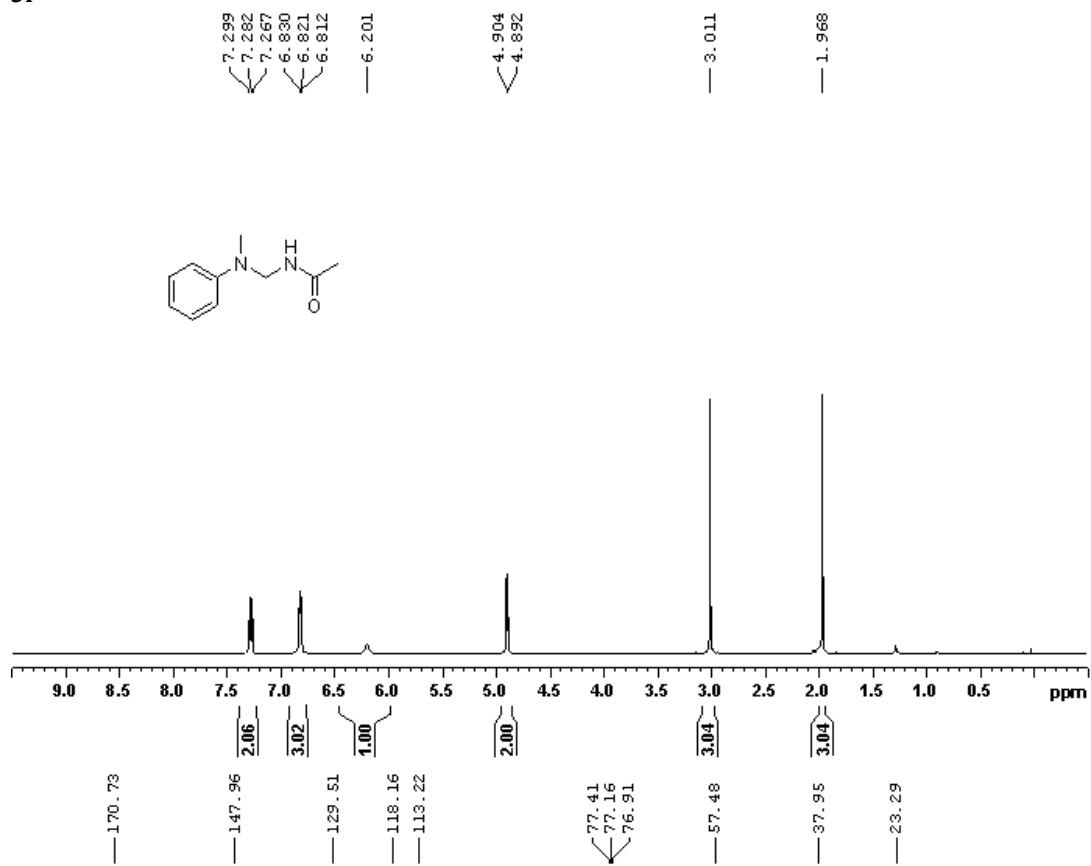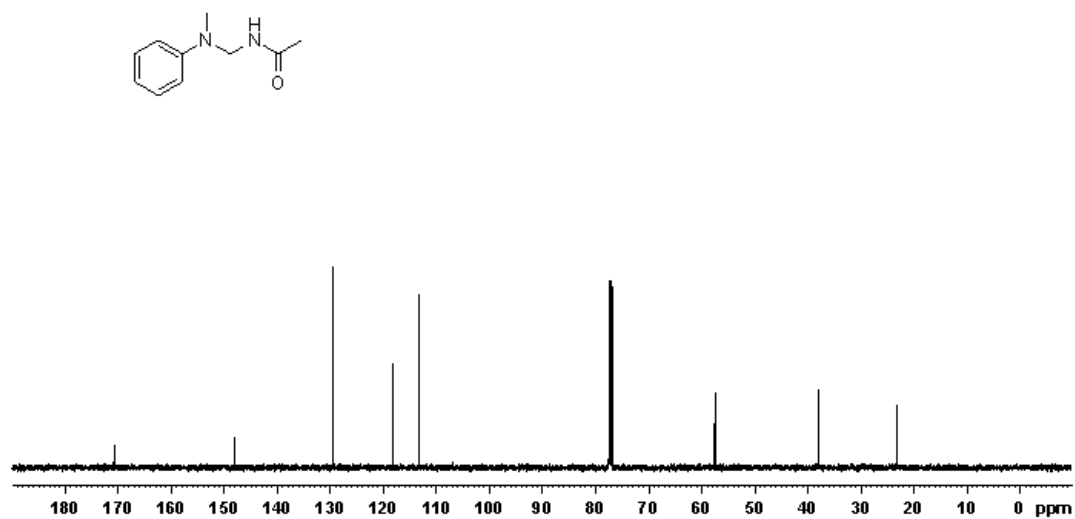

3m

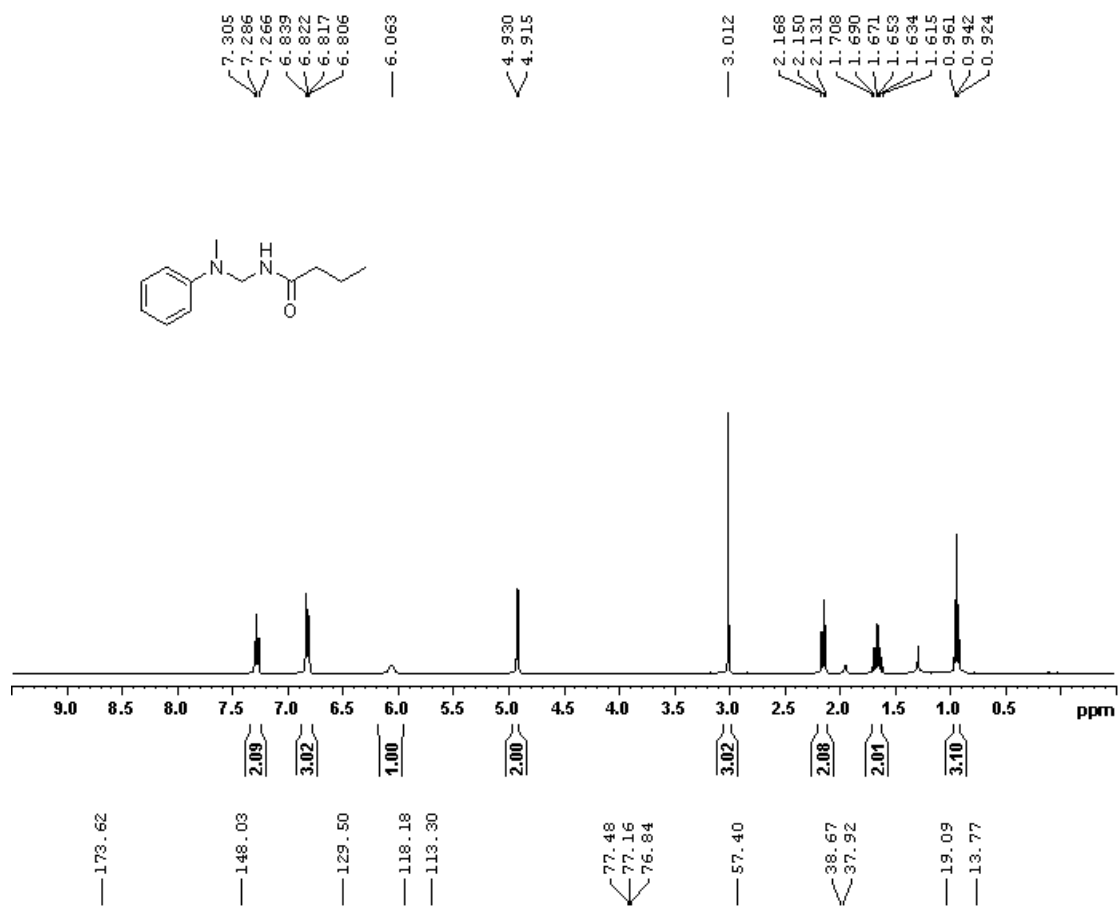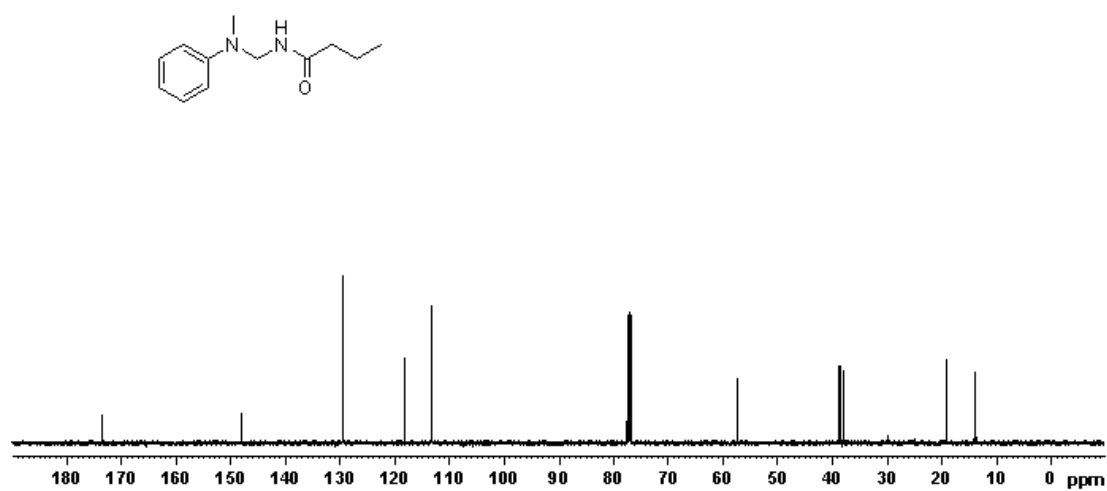

3n

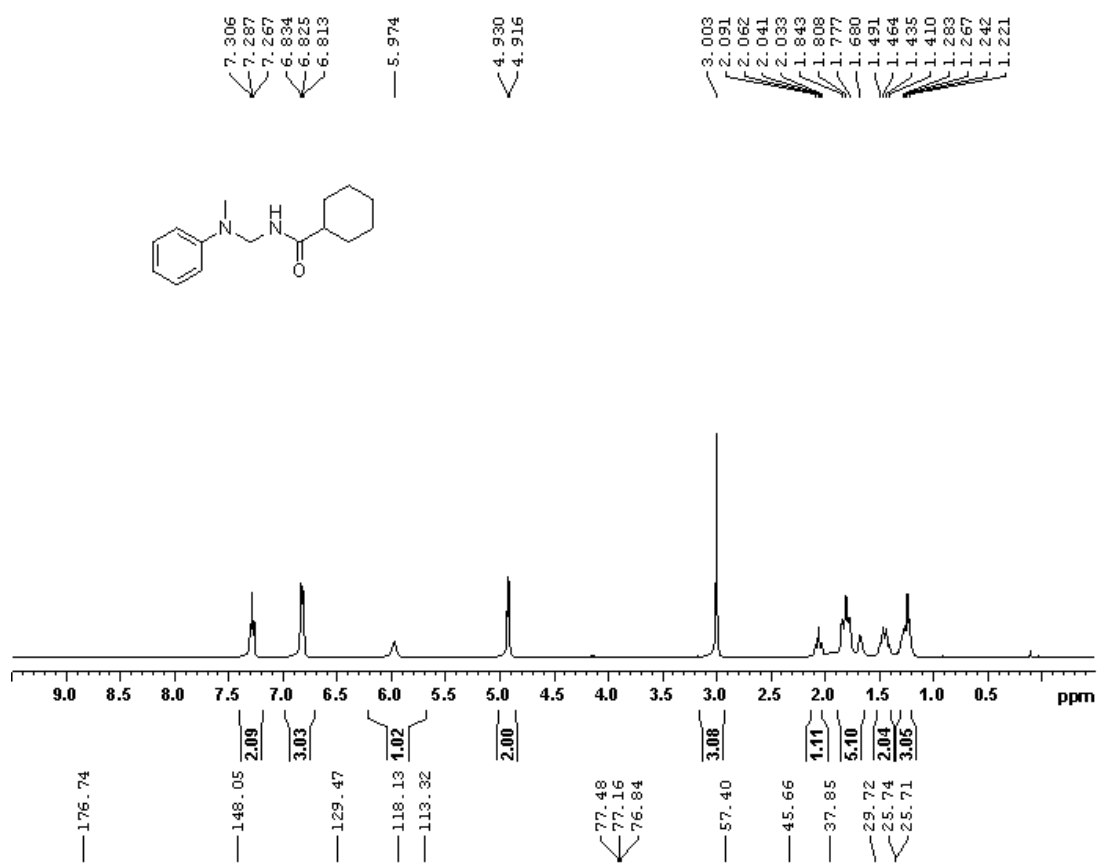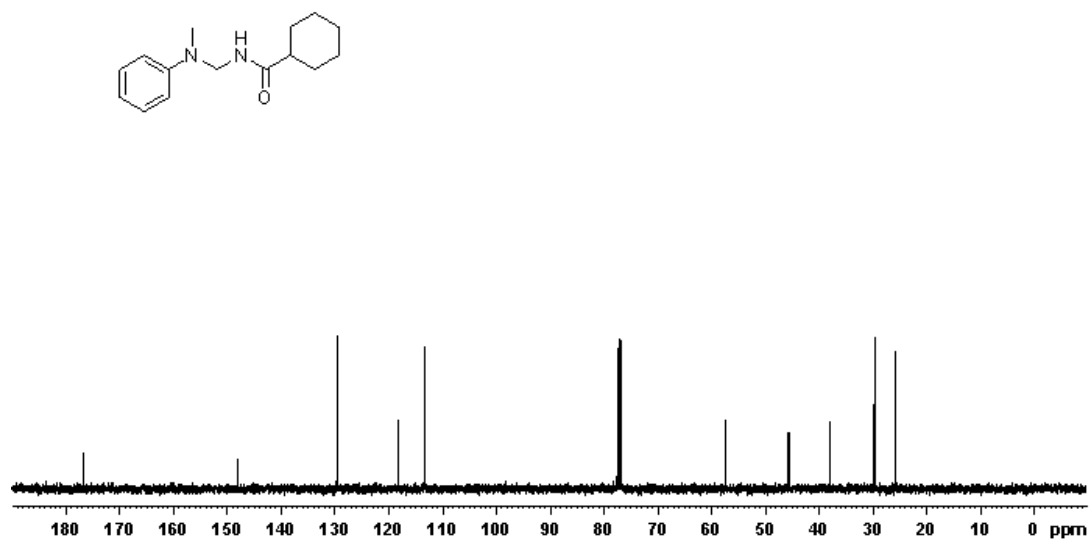

30

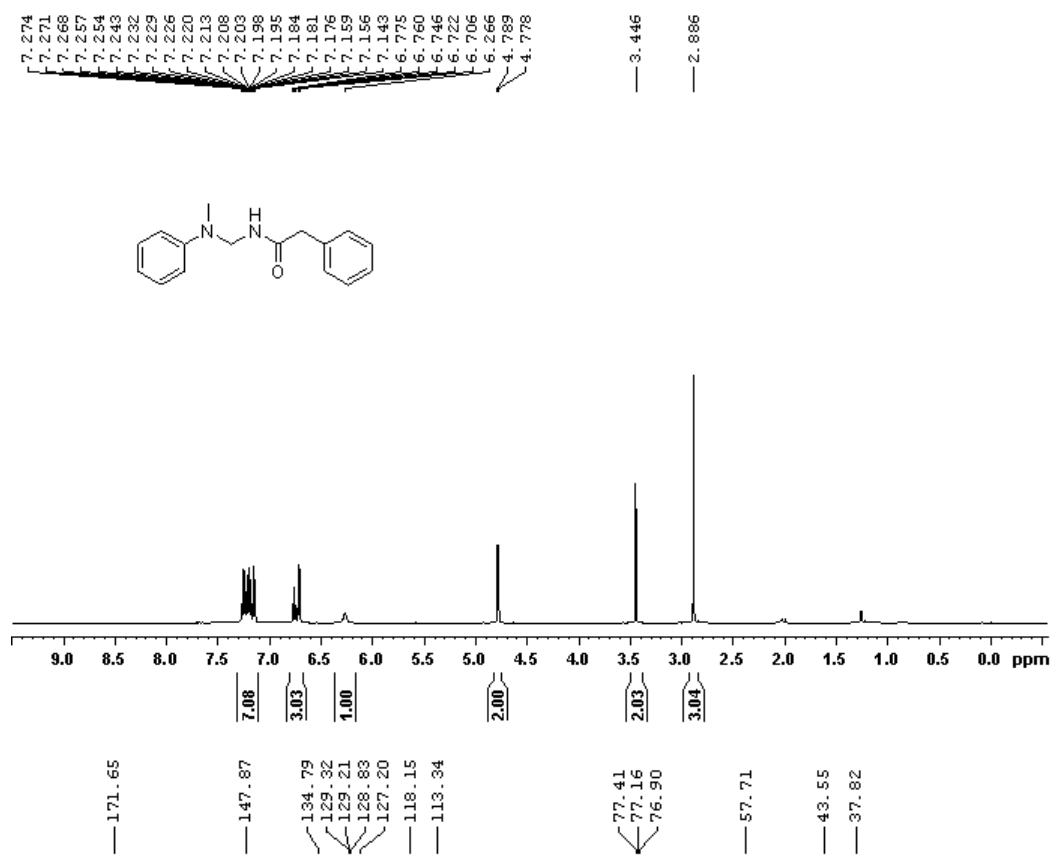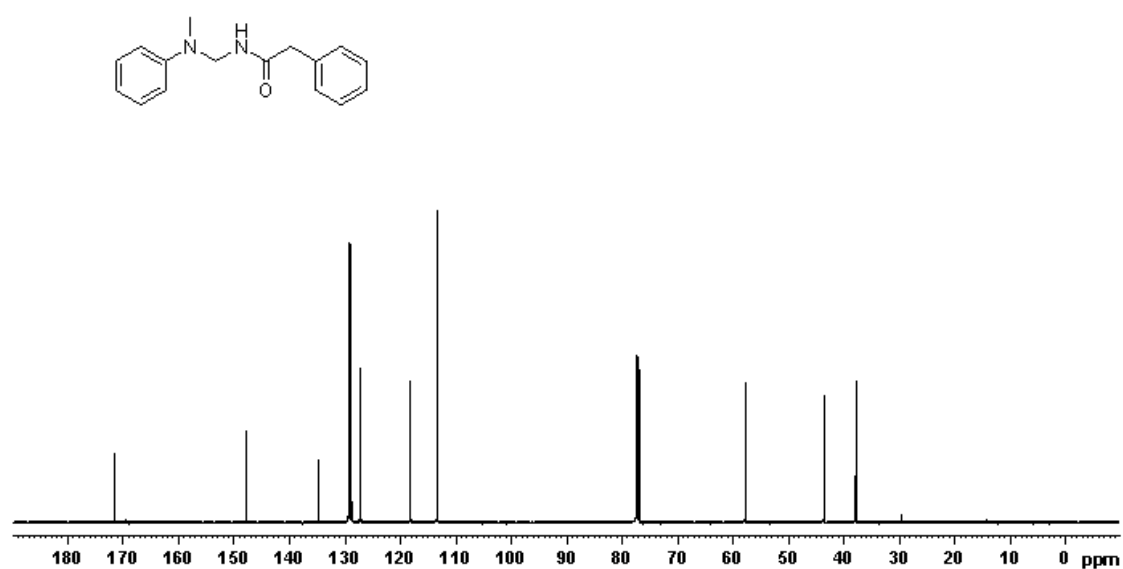

3q

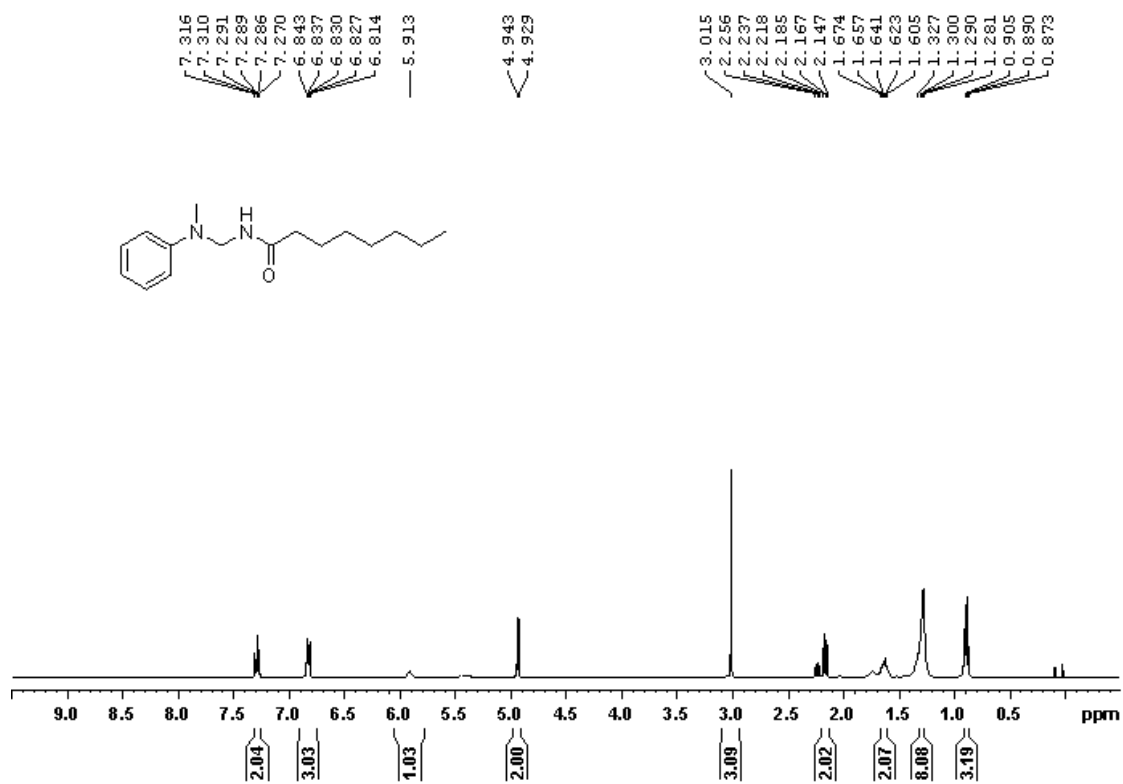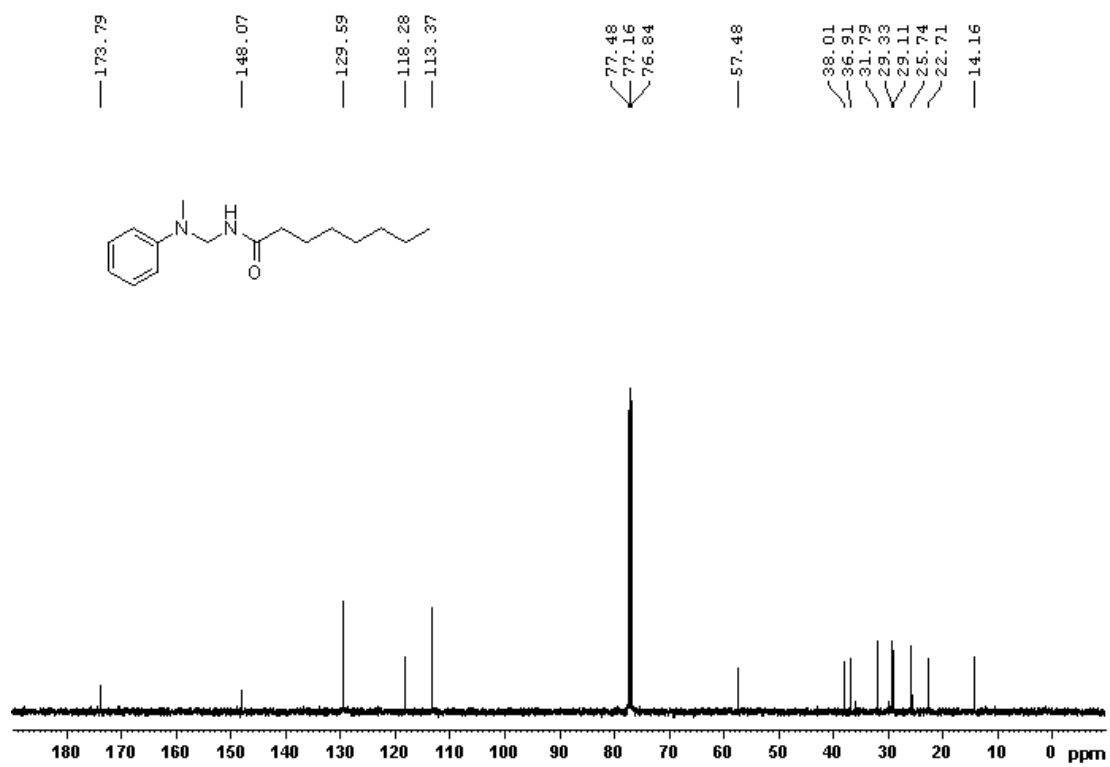

3p

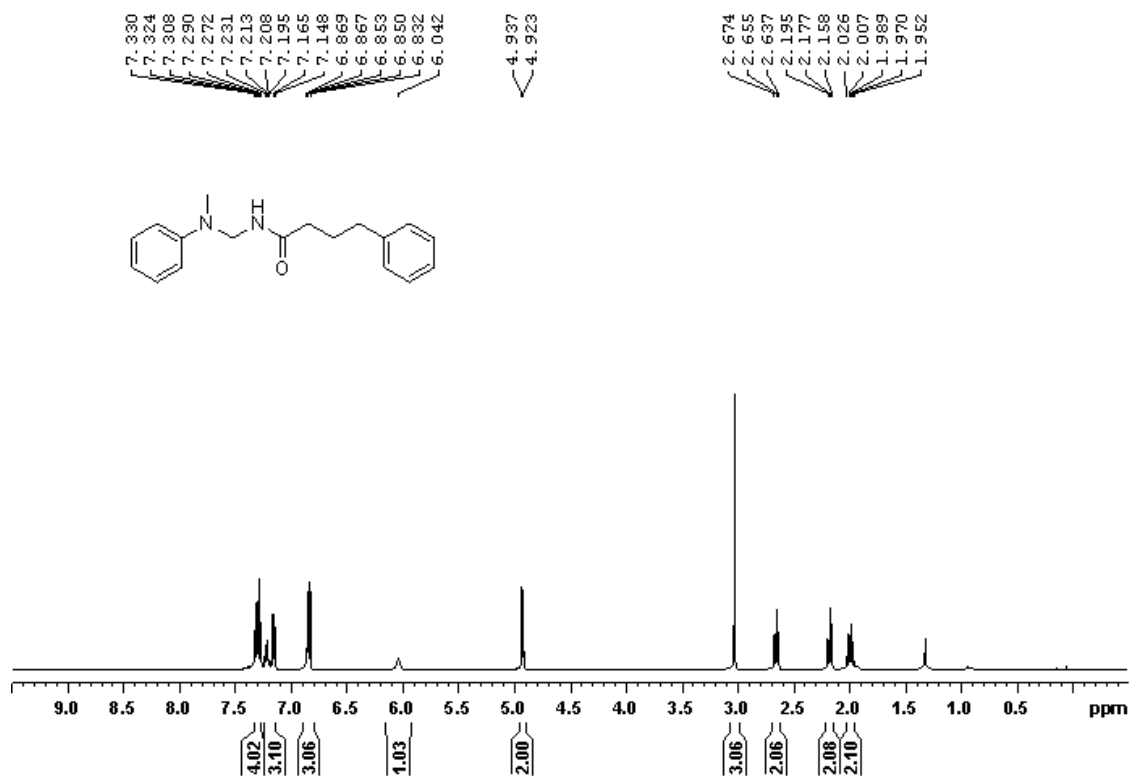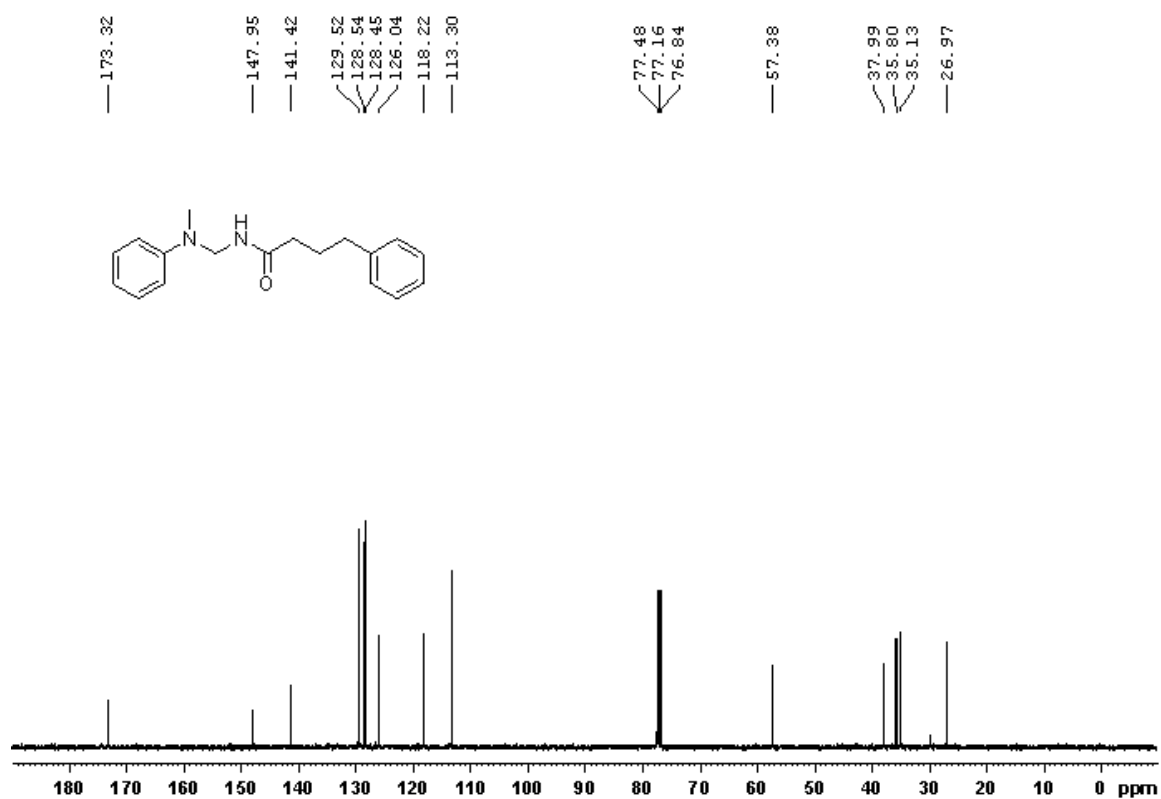



3r

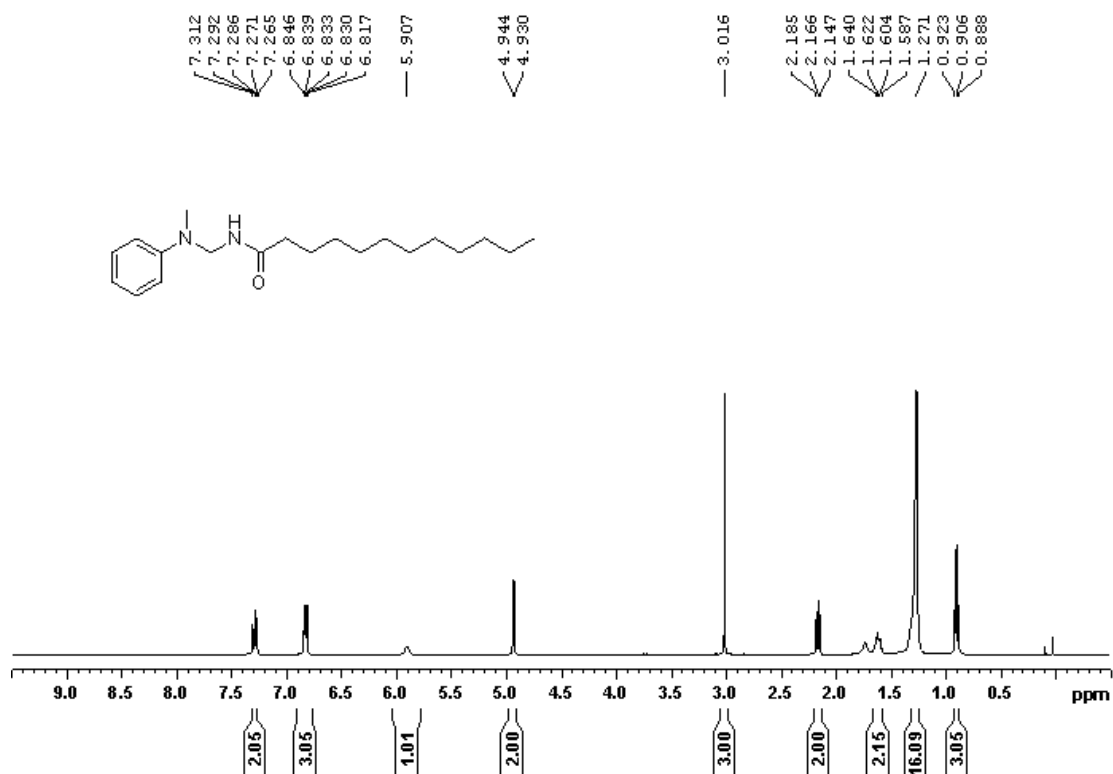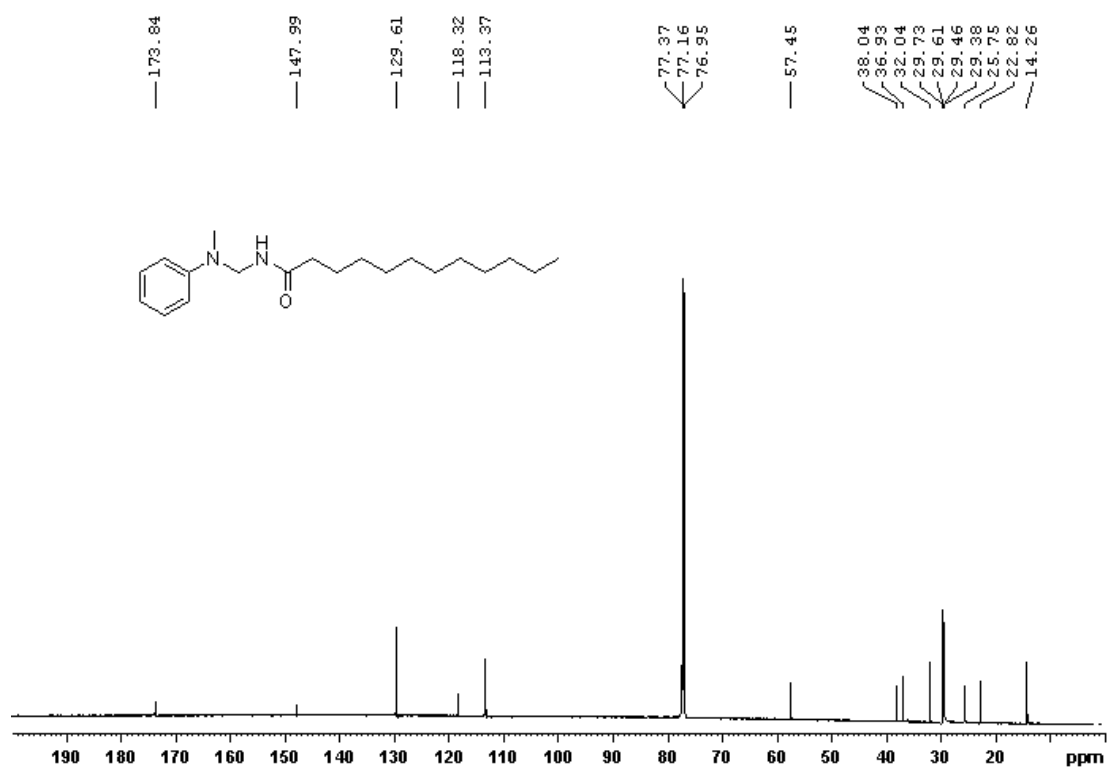

3s

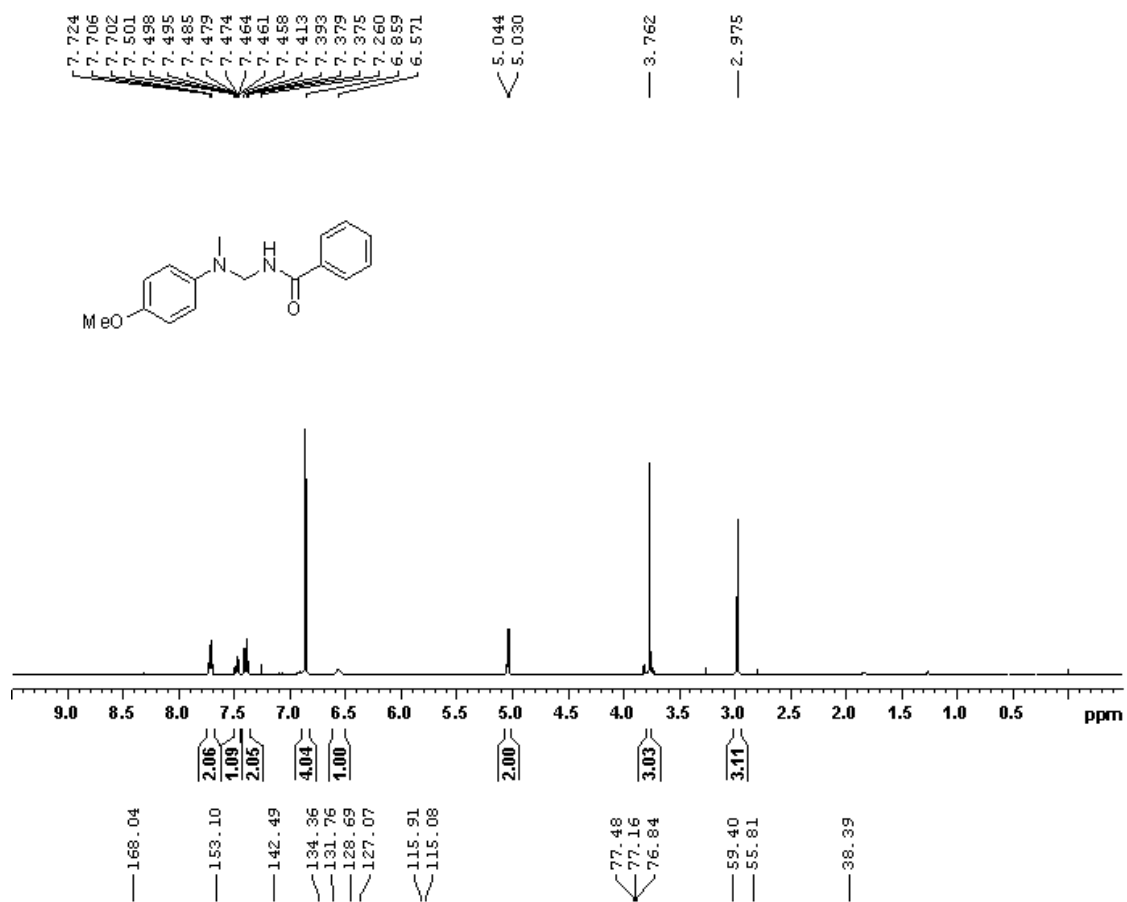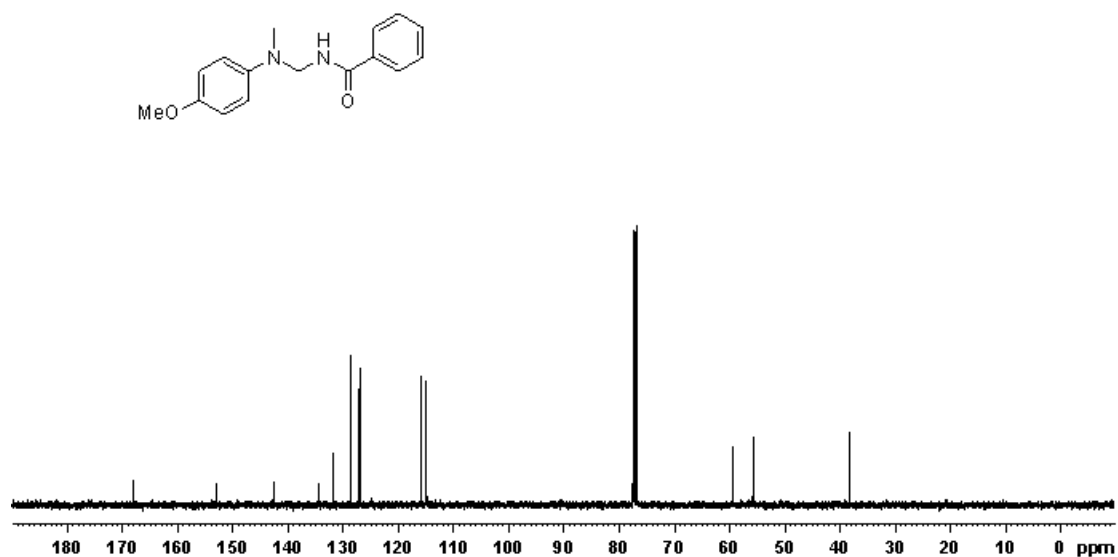

3t

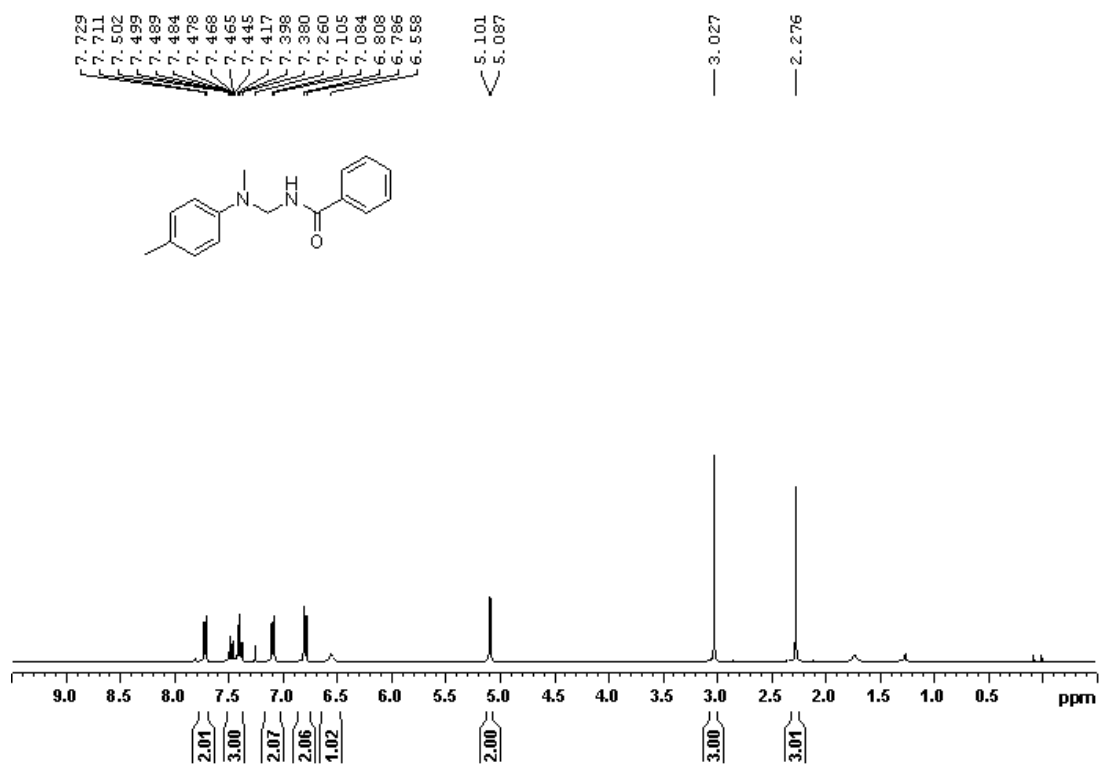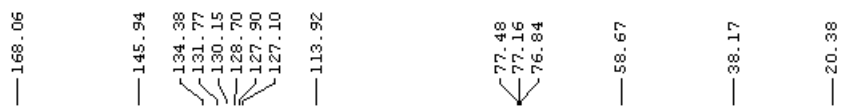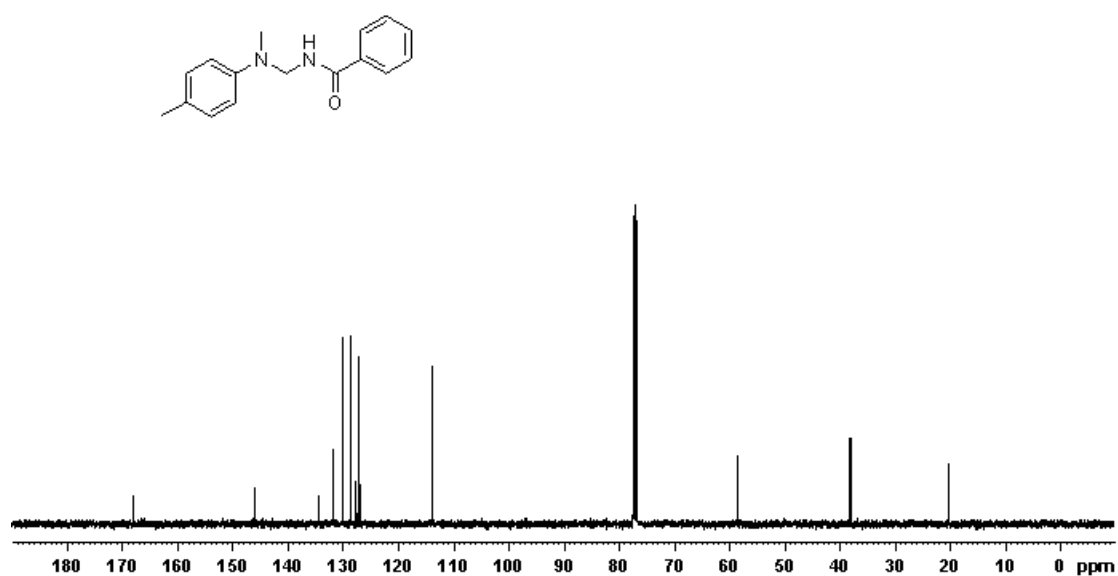

The *in situ* generation of 2,2,6,6-tetramethylpiperidine (TEMP, HRMS Calcd for  $C_9H_{20}N^+$ ,  $[M+H]^+$  142.1590, found 142.1593) was proved using the HRMS (FT-ICR-MS) technique.

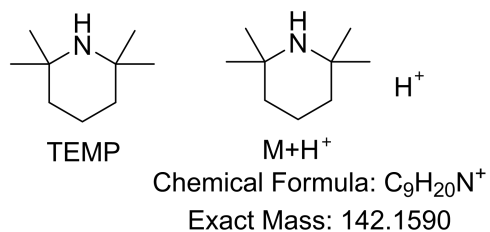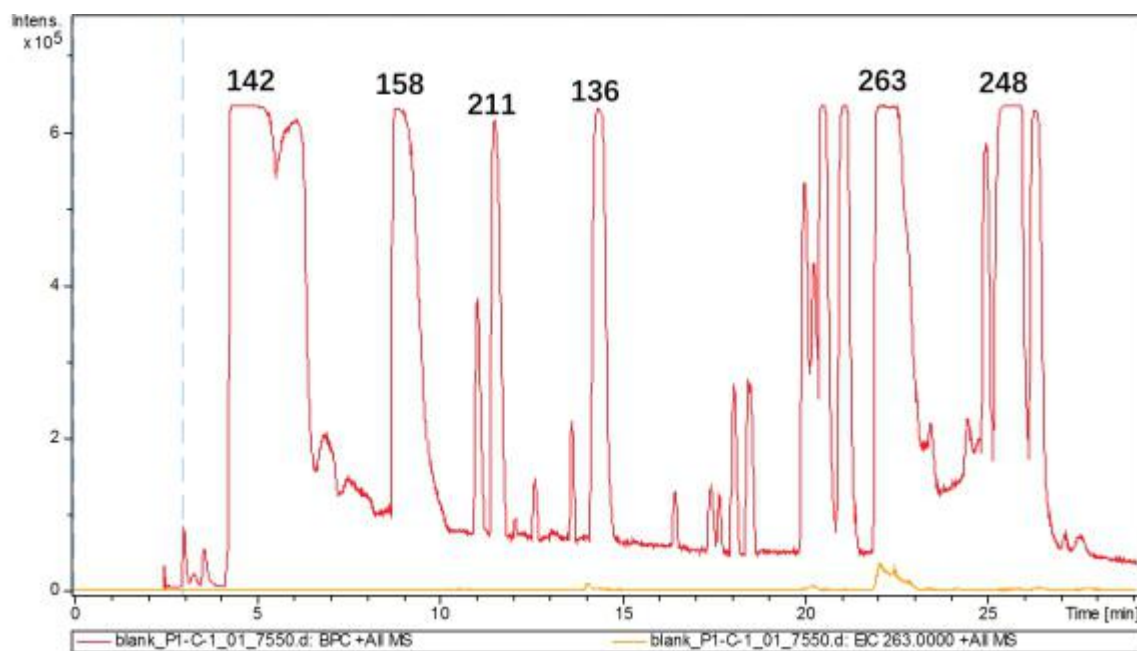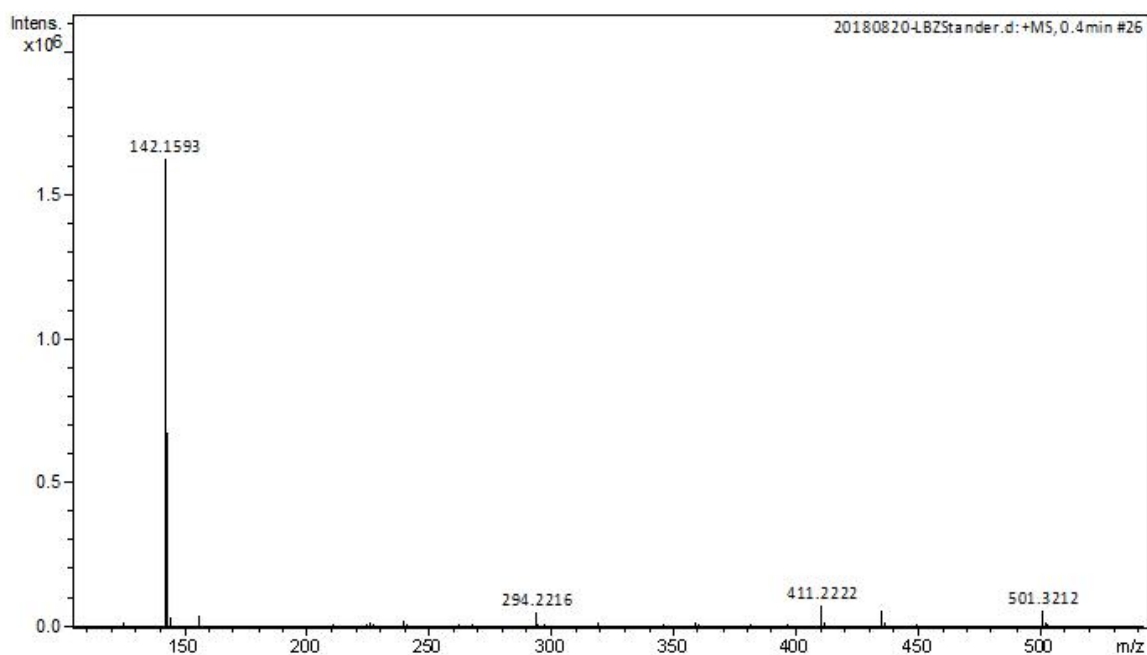

Supplement: c8qo00794b1.pdf [file c8qo00794b1.pdf]
